# Supplementary material for: A New Exact Algorithm for Single-Commodity Vehicle Routing with Split Pickups and Deliveries
Source: Atypon-hosted journal article supplement (doi:10.1287/ijoc.2022.1249), 2023-01-01
Supplement: ijoc.2022.1249.sm1.pdf [file ijoc.2022.1249.sm1.pdf]

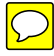

# Proofs of statements, example, vehicle flow formulation and additional computational results

## EC.1. Proofs of statements

This section gives the proofs of the different results of the main paper.

The proofs of Theorems 1 and 2 are based on the following lemma about the problem of minimizing a generic piecewise-linear convex function  $f: \mathbb{R}_+ \rightarrow \mathbb{R}$  expressed as  $f(x) = \max_{h \in H} \{a_h x + b_h\}$ , where  $H = \{1, 2, \dots, m\}$  is the index set of its breakpoints, over an interval  $[l, u]$ , with  $l \leq u$ ,  $l, u \in \mathbb{R}_+$ . Let  $H^- = \{h \in H \mid a_h < 0\}$ , and let  $H^+ = \{h \in H \mid a_h \geq 0\}$ . Based on sets  $H^-$  and  $H^+$ , let functions  $f^-: \mathbb{R}_+ \rightarrow \mathbb{R}$  and  $f^+: \mathbb{R}_+ \rightarrow \mathbb{R}$  defined as  $f^-(x) = \max_{h \in H^-} \{a_h x + b_h\}$ , if  $H^- \neq \emptyset$ ,  $f^-(x) = -\infty$  otherwise, and  $f^+(x) = \max_{h \in H^+} \{a_h x + b_h\}$ , if  $H^+ \neq \emptyset$ ,  $f^+(x) = -\infty$  otherwise. The following lemma holds.

LEMMA EC.1. *Let  $z^* = \min_x \{f(x)\}$ . Then  $\min_{l \leq x \leq u} \{f(x)\} = \max\{f^-(u), f^+(l), z^*\}$ .*

*Proof.* Let  $x^* = \arg \min f(x)$ . We have the following three cases.

- (i)  $u < x^*$ . We have  $f^-(u) \geq z^* \geq f^+(u) \geq f^+(l)$ . Since  $f(x)$  is a non-increasing function in  $[l, u]$ , we have  $\min_{l \leq x \leq u} f(x) = f(u) = \max\{f^-(u), f^+(u)\} = f^-(u) = \max\{f^-(u), f^+(l), z^*\}$ .
- (ii)  $l \leq x^* \leq u$ . We have  $z^* \geq f^-(u)$  and  $z^* \geq f^+(l)$ . Hence,  $\min_{l \leq x \leq u} f(x) = z^* = \max\{f^-(u), f^+(l), z^*\}$ .
- (iii)  $x^* < l$ . We have  $f^+(l) \geq z^* \geq f^-(l) \geq f^-(u)$ . Since  $f(x)$  is a non-decreasing function in  $[l, u]$ , we have  $\min_{l \leq x \leq u} f(x) = f(l) = \max\{f^-(l), f^+(l)\} = f^+(l) = \max\{f^-(u), f^+(l), z^*\}$ .

### EC.1.1. Proof of Theorem 1

Given a forward path  $P = (i_0 = 0, i_1, \dots, i_{s-1}, i_s)$ , the proof is by the induction principle on  $s$ . Let  $W(P) \leq Q$  be the maximum amount of product collected from the pickup customers along path  $P$  that can be delivered to the delivery customers to be appended to the path. If  $s = 0$ , i.e.,  $P = (0)$ , we have  $W(P) = 0$  and  $\bar{c}_P^f(w) = -\mu_0$ , hence the hypothesis holds. Assume that for path  $P = (i_0 = 0, i_1, \dots, i_{s-1})$  the hypothesis holds, i.e.,  $\bar{c}_P^f(w)$  can be expressed in the form  $\bar{c}_P^f(w) = \max_{h \in H} \{a_h w + b_h\}$ , where  $H$  is the set of breakpoints and  $a_h \geq 0, \forall h \in H$ .

Consider a new vertex  $i_s \notin V(P)$  appended at the end of path  $P$  and the corresponding path  $P' = (i_0 = 0, i_1, \dots, i_{s-1}, i_s)$ . We have two cases:

- (i) Vertex  $i_s$  is a pickup vertex, i.e.,  $q_{i_s} > 0$ . We have  $W(P') = \min\{Q, W(P) + q_{i_s}\}$ , and

$$\begin{aligned} \bar{c}_{P'}^f(w) &= \min_{\max\{0, w - q_{i_s}\} \leq x \leq \min\{W(P), w\}} \{\bar{c}_P^f(x) - \mu_{i_s}(w - x) + d_{i_{s-1}i_s}\}, \\ &= \min_{\max\{0, w - q_{i_s}\} \leq x \leq \min\{W(P), w\}} \left\{ \max_{h \in H} \{a_h x + b_h\} - \mu_{i_s}(w - x) + d_{i_{s-1}i_s} \right\}, \\ &= \min_{\max\{0, w - q_{i_s}\} \leq x \leq \min\{W(P), w\}} \left\{ \max_{h \in H} \{(a_h + \mu_{i_s})x + b_h\} - \mu_{i_s}w + d_{i_{s-1}i_s} \right\}. \end{aligned}$$

Let  $H^+ = \{h : h \in H, a_h + \mu_{i_s} \geq 0\}$ ,  $H^- = \{h : h \in H, a_h + \mu_{i_s} < 0\}$ , and  $z^* = \min_x \{\max_{h \in H} \{(a_h + \mu_{i_s})x + b_h\}\}$ . From Lemma EC.1, we have:

$$\begin{aligned} \bar{c}_{P'}^f(w) &= \max \left\{ \begin{array}{l} -\mu_{i_s} w + z^* + d_{i_{s-1}i_s}, \\ \max_{h \in H^-} \{(a_h + \mu_{i_s}) \min\{W(P), w\} + b_h - \mu_{i_s} w + d_{i_{s-1}i_s}\}, \\ \max_{h \in H^+} \{(a_h + \mu_{i_s}) \max\{0, w - q_{i_s}\} + b_h - \mu_{i_s} w + d_{i_{s-1}i_s}\} \end{array} \right\}, \\ &= \max \left\{ \begin{array}{l} -\mu_{i_s} w + z^* + d_{i_{s-1}i_s}, \\ \max_{h \in H^-} \{\max\{(a_h + \mu_{i_s})W(P), (a_h + \mu_{i_s})w\} + b_h - \mu_{i_s} w + d_{i_{s-1}i_s}\}, \\ \max_{h \in H^+} \{(a_h + \mu_{i_s}) \max\{0, w - q_{i_s}\} + b_h - \mu_{i_s} w + d_{i_{s-1}i_s}\} \end{array} \right\}, \\ &= \max \left\{ \begin{array}{l} -\mu_{i_s} w + z^* + d_{i_{s-1}i_s}, \\ \max_{h \in H^-} \{(a_h + \mu_{i_s})W(P) + b_h\} - \mu_{i_s} w + d_{i_{s-1}i_s}, \\ \max_{h \in H^-} \{a_h w + b_h\} + d_{i_{s-1}i_s}, \\ \max_{h \in H^+} \{b_h\} - \mu_{i_s} w + d_{i_{s-1}i_s}, \\ \max_{h \in H^+} \{a_h w - (a_h + \mu_{i_s})q_{i_s} + b_h + d_{i_{s-1}i_s}\} \end{array} \right\}, \\ &= \max \left\{ \begin{array}{l} -\mu_{i_s} w + \max \left\{ z^*, \max_{h \in H^-} \{(a_h + \mu_{i_s})W(P) + b_h\}, \max_{h \in H^+} \{b_h\} \right\} + d_{i_{s-1}i_s}, \\ \max_{h \in H^-} \{a_h w + b_h\} + d_{i_{s-1}i_s}, \\ \max_{h \in H^+} \{a_h w - (a_h + \mu_{i_s})q_{i_s} + b_h\} + d_{i_{s-1}i_s}, \end{array} \right\}. \end{aligned}$$

Since  $\mu_{i_s} \leq 0$ ,  $\bar{c}_{P'}^f(w)$  is the maximum of piecewise-linear nondecreasing functions, hence it is a piecewise-linear convex nondecreasing function.

(ii) Vertex  $i_s$  is a delivery vertex, i.e.,  $q_{i_s} < 0$ . We have  $W(P') = W(P)$ , and

$$\begin{aligned} \bar{c}_{P'}^f(w) &= \min_{w \leq x \leq \min\{W(P), w - q_{i_s}\}} \{\bar{c}_P^f(x) - \mu_{i_s}(w - x) + d_{i_{s-1}i_s}\} \\ &= \min_{w \leq x \leq \min\{W(P), w - q_{i_s}\}} \left\{ \max_{h \in H} \{a_h x + b_h\} - \mu_{i_s}(w - x) + d_{i_{s-1}i_s} \right\} \\ &= \min_{w \leq x \leq \min\{W(P), w - q_{i_s}\}} \left\{ \max_{h \in H} \{(a_h + \mu_{i_s})x + b_h\} - \mu_{i_s} w + d_{i_{s-1}i_s} \right\}. \end{aligned}$$

Let  $H^+$ ,  $H^-$  and  $z^*$  be defined as for the previous case. We have:

$$\begin{aligned} \bar{c}_{P'}^f(w) &= \max \left\{ \begin{array}{l} -\mu_{i_s} w + z^* + d_{i_{s-1}i_s}, \\ \max_{h \in H^-} \{(a_h + \mu_{i_s}) \min\{W(P), w - q_{i_s}\} + b_h - \mu_{i_s} w + d_{i_{s-1}i_s}\}, \\ \max_{h \in H^+} \{(a_h + \mu_{i_s})w + b_h - \mu_{i_s} w + d_{i_{s-1}i_s}\} \end{array} \right\}, \\ &= \max \left\{ \begin{array}{l} -\mu_{i_s} w + z^* + d_{i_{s-1}i_s}, \\ \max_{h \in H^-} \{\max\{(a_h + \mu_{i_s})W(P), (a_h + \mu_{i_s})(w - q_{i_s})\} + b_h - \mu_{i_s} w + d_{i_{s-1}i_s}\}, \\ \max_{h \in H^+} \{(a_h + \mu_{i_s})w + b_h - \mu_{i_s} w + d_{i_{s-1}i_s}\} \end{array} \right\}, \end{aligned}$$

$$\begin{aligned}
&= \max \left\{ \begin{array}{l} -\mu_{i_s} w + z^* + d_{i_{s-1}i_s}, \\ -\mu_{i_s} w + \max_{h \in H^-} \{(a_h + \mu_{i_s})W(P) + b_h\} + d_{i_{s-1}i_s}, \\ \max_{h \in H^-} \{a_h w - (a_h + \mu_{i_s})q_{i_s} + b_h + d_{i_{s-1}i_s}\}, \\ \max_{h \in H^+} \{(a_h + \mu_{i_s})w + b_h - \mu_{i_s} w + d_{i_{s-1}i_s}\} \end{array} \right\}, \\
&= \max \left\{ \begin{array}{l} -\mu_{i_s} w + \max\{z^*, \max_{h \in H^-} \{(a_h + \mu_{i_s})W(P) + b_h\}\} + d_{i_{s-1}i_s}, \\ \max_{h \in H^-} \{a_h w - (a_h + \mu_{i_s})q_{i_s} + b_h\} + d_{i_{s-1}i_s}, \\ \max_{h \in H^+} \{a_h w + b_h\} + d_{i_{s-1}i_s} \end{array} \right\}.
\end{aligned}$$

Since  $\mu_{i_s} \leq 0$ ,  $\bar{c}_{P'}^f(w)$  is also a piecewise-linear convex nondecreasing function.

### EC.1.2. Proof of Theorem 2

Given a backward path  $\bar{P} = (i_s, i_{s-1}, \dots, i_1, i_0 = n')$ , the proof is by the induction principle on  $s$ . Let  $W(\bar{P}) \leq Q$  be the maximum amount of the product required by the delivery customers along path  $\bar{P}$  that can potentially be collected from the (pickup) customers, which is to be appended at the beginning of path  $\bar{P}$ .

If  $s = 0$ , i.e.,  $\bar{P} = (n')$ , we have  $W(\bar{P}) = 0$  and  $\bar{c}_{\bar{P}}^b(w) = -\mu_0$ , hence the hypothesis holds. Assume that for path  $\bar{P} = (i_{s-1}, \dots, i_1, i_0 = n')$  the hypothesis holds, that is,  $\bar{c}_{\bar{P}}^b(w)$  can be expressed in the form  $\bar{c}_{\bar{P}}^b(w) = \max_{h \in H} \{a_h w + b_h\}$ , where  $H$  is the set of breakpoints and  $a_h \leq 0, \forall h \in H$ .

Consider a new vertex  $i_s \notin V(\bar{P})$  appended at the beginning of path  $\bar{P}$  and the corresponding path  $\bar{P}' = (i_s, i_{s-1}, \dots, i_1, i_0 = n')$ . We have two cases:

- (i) Vertex  $i_s$  is a delivery vertex, that is,  $q_{i_s} < 0$ . We have  $W(\bar{P}') = \min\{Q, W(\bar{P}) - q_{i_s}\}$ , and

$$\begin{aligned}
\bar{c}_{\bar{P}'}^b(w) &= \min_{\max\{0, w + q_{i_s}\} \leq x \leq \min\{W(\bar{P}'), w\}} \{\bar{c}_{\bar{P}}^b(x) - \mu_{i_s}(x - w) + d_{i_s i_{s-1}}\} \\
&= \min_{\max\{0, w + q_{i_s}\} \leq x \leq \min\{W(\bar{P}'), w\}} \left\{ \max_{h \in H} \{a_h x + b_h\} - \mu_{i_s}(x - w) + d_{i_s i_{s-1}} \right\} \\
&= \min_{\max\{0, w + q_{i_s}\} \leq x \leq \min\{W(\bar{P}'), w\}} \left\{ \max_{h \in H} \{(a_h - \mu_{i_s})x + b_h\} + \mu_{i_s} w + d_{i_s i_{s-1}} \right\}.
\end{aligned}$$

Let  $H^+ = \{h : h \in H, a_h - \mu_{i_s} \geq 0\}$ ,  $H^- = \{h : h \in H, a_h - \mu_{i_s} < 0\}$  and  $z^* = \min_x \max_{h \in H} \{(a_h - \mu_{i_s})x + b_h\}$ . From Lemma EC.1, we have:

$$\begin{aligned}
\bar{c}_{\bar{P}'}^b(w) &= \max \left\{ \begin{array}{l} \mu_{i_s} w + z^* + d_{i_s i_{s-1}}, \\ \max_{h \in H^-} \{(a_h - \mu_{i_s}) \min\{W(\bar{P}'), w\} + b_h + \mu_{i_s} w + d_{i_s i_{s-1}}\}, \\ \max_{h \in H^+} \{(a_h - \mu_{i_s}) \max\{0, w + q_{i_s}\} + b_h + \mu_{i_s} w + d_{i_s i_{s-1}}\} \end{array} \right\}, \\
&= \max \left\{ \begin{array}{l} \mu_{i_s} w + z^* + d_{i_s i_{s-1}}, \\ \max_{h \in H^-} \{\max\{(a_h - \mu_{i_s})W(\bar{P}'), (a_h - \mu_{i_s})w\} + b_h + \mu_{i_s} w + d_{i_s i_{s-1}}\}, \\ \max_{h \in H^+} \{(a_h - \mu_{i_s}) \max\{0, w + q_{i_s}\} + b_h + \mu_{i_s} w + d_{i_s i_{s-1}}\} \end{array} \right\},
\end{aligned}$$

$$\begin{aligned}
&= \max \left\{ \begin{array}{l} \mu_{i_s} w + z^* + d_{i_s i_{s-1}}, \\ \mu_{i_s} w + \max_{h \in H^-} \{(a_h - \mu_{i_s})W(\bar{P}) + b_h\} + d_{i_s i_{s-1}}, \\ \max_{h \in H^-} \{a_h w + b_h + d_{i_s i_{s-1}}\}, \\ \mu_{i_s} w + \max_{h \in H^+} \{b_h\} + d_{i_s i_{s-1}}, \\ \max_{h \in H^+} \{a_h w + (a_h - \mu_{i_s})q_{i_s} + b_h + d_{i_s i_{s-1}}\} \end{array} \right\}, \\
&= \max \left\{ \begin{array}{l} \mu_{i_s} w + \max \left\{ z^*, \max_{h \in H^-} \{(a_h - \mu_{i_s})W(\bar{P}) + b_h\}, \max_{h \in H^+} \{b_h\} \right\} + d_{i_s i_{s-1}}, \\ \max_{h \in H^-} \{a_h w + b_h\} + d_{i_s i_{s-1}}, \\ \max_{h \in H^+} \{a_h w + (a_h - \mu_{i_s})q_{i_s} + b_h\} + d_{i_s i_{s-1}} \end{array} \right\}.
\end{aligned}$$

Since  $\mu_{i_s} \leq 0$ ,  $\bar{c}_{\bar{P}'}^b(w)$  is the maximum of piecewise-linear nonincreasing functions, it is a piecewise-linear convex nonincreasing function.

(ii) Vertex  $i_s$  is a pickup vertex, i.e.,  $q_{i_s} > 0$ . We have  $W(\bar{P}') = W(\bar{P})$ , and

$$\begin{aligned}
\bar{c}_{\bar{P}'}^b(w) &= \min_{w \leq x \leq \min\{W(\bar{P}), w + q_{i_s}\}} \{\bar{c}_{\bar{P}'}^b(x) - \mu_{i_s}(x - w) + d_{i_s i_{s-1}}\} \\
&= \min_{w \leq x \leq \min\{W(\bar{P}), w + q_{i_s}\}} \left\{ \max_{h \in H} \{a_h x + b_h\} - \mu_{i_s}(x - w) + d_{i_s i_{s-1}} \right\} \\
&= \min_{w \leq x \leq \min\{W(\bar{P}), w + q_{i_s}\}} \left\{ \max_{h \in H} \{(a_h - \mu_{i_s})x + b_h\} + \mu_{i_s} w + d_{i_s i_{s-1}} \right\}.
\end{aligned}$$

Let  $H^+$ ,  $H^-$  and  $z^*$  be defined as for the previous case. We have:

$$\begin{aligned}
\bar{c}_{\bar{P}'}^b(w) &= \max \left\{ \begin{array}{l} \mu_{i_s} w + z^* + d_{i_s i_{s-1}}, \\ \max_{h \in H^-} \{(a_h - \mu_{i_s}) \min\{W(\bar{P}), w + q_{i_s}\} + b_h + \mu_{i_s} w + d_{i_s i_{s-1}}\}, \\ \max_{h \in H^+} \{(a_h - \mu_{i_s})w + b_h + \mu_{i_s} w + d_{i_s i_{s-1}}\} \end{array} \right\}, \\
&= \max \left\{ \begin{array}{l} \mu_{i_s} w + z^* + d_{i_s i_{s-1}}, \\ \max_{h \in H^-} \{\max\{(a_h - \mu_{i_s})W(\bar{P}), (a_h - \mu_{i_s})(w + q_{i_s})\} + b_h + \mu_{i_s} w + d_{i_s i_{s-1}}\}, \\ \max_{h \in H^+} \{(a_h - \mu_{i_s})w + b_h + \mu_{i_s} w + d_{i_s i_{s-1}}\} \end{array} \right\}, \\
&= \max \left\{ \begin{array}{l} \mu_{i_s} w + z^* + d_{i_s i_{s-1}}, \\ \mu_{i_s} w + \max_{h \in H^-} \{(a_h - \mu_{i_s})W(\bar{P}) + b_h\} + d_{i_s i_{s-1}}, \\ \max_{h \in H^-} \{a_h w + (a_h - \mu_{i_s})q_{i_s} + b_h + d_{i_s i_{s-1}}\}, \\ \max_{h \in H^+} \{a_h w + b_h + d_{i_s i_{s-1}}\} \end{array} \right\}, \\
&= \max \left\{ \begin{array}{l} \mu_{i_s} w + \max\{z^*, \max_{h \in H^-} \{(a_h - \mu_{i_s})W(\bar{P}) + b_h\}\} + d_{i_s i_{s-1}}, \\ \max_{h \in H^-} \{a_h w + (a_h - \mu_{i_s})q_{i_s} + b_h\} + d_{i_s i_{s-1}}, \\ \max_{h \in H^+} \{a_h w + b_h\} + d_{i_s i_{s-1}} \end{array} \right\}.
\end{aligned}$$

Since  $\mu_{i_s} \leq 0$ ,  $\bar{c}_{\bar{P}'}^b(w)$  is also a piecewise-linear convex nonincreasing function.

### EC.1.3. Proof of Dominance 1

Let  $P$  be the forward path associated with label  $L_1^f$ , and we denote by  $\{L_{i_1}^f, L_{i_2}^f, \dots, L_{i_k}^f\}$  the set of labels  $\mathcal{L}_1^f$ , where a forward path  $P_{i_s}$  is associated with label  $L_{i_s}^f$ ,  $s = 1, \dots, k$ .

Consider the set  $\mathcal{P}$  of all feasible extensions of path  $P$ , i.e., the set of backward paths starting at vertices different from vertex  $v_1^f$  such that for each  $\bar{P} \in \mathcal{P}$  route  $R = (P, \bar{P})$  is feasible for the maximum duration constraint. Let  $w(P)$ ,  $w(P) \in [0, \min\{W_1^f, W(\bar{P})\}]$ , be the load of the vehicle leaving the last vertex  $v_1^f$  visited by route  $R$  where  $W(\bar{P}) \leq Q$  is the maximum amount of the product required by the delivery customers along path  $\bar{P}$ , and let  $j$  be the first vertex visited by path  $\bar{P}$ . The reduced cost of route  $R$  and value  $w(P)$  can be computed as follows:

$$\bar{c}(R, w(P)) = \bar{c}_P^f(w(P)) + d_{v_1^f j} + \bar{c}_{\bar{P}}^b(w(P)).$$

Below, we show that for any path  $\bar{P} \in \mathcal{P}$  and associated value  $w(P)$ , there exists a forward path  $P' \in \{P_{i_s}\}_{s=1}^k$  such that route  $R' = (P', \bar{P})$  is feasible and its reduced cost  $\bar{c}(R', w(P))$  is less than or equal to the reduced cost  $\bar{c}(R, w(P))$  of route  $R$ , and thus path  $P$  can be safely discarded.

Given a path  $\bar{P} \in \mathcal{P}$ , since  $v^f = v_1^f$ ,  $s^f \geq s_1^f$ , and  $V_1^f \subseteq V^f$ , for all  $L^f \in \mathcal{L}_1^f$ , each route  $R' = (P', \bar{P})$  with  $P' \in \{P_{i_s}\}_{s=1}^k$  is feasible for the maximum duration constraint. Let  $i^* = \arg \min_{s=1, \dots, k} \{\bar{c}_{P_{i_s}}^f(w(P))\}$  be the index of the labels in  $\mathcal{L}_1^f$  having minimum reduced cost computed with respect to value  $w(P)$ .

Since  $w(P) \leq W_1^f$ , we have  $g_{L_1^f}(w(P)) = \bar{c}_P^f(w(P)) < +\infty$ , and given the definition of function  $\bar{g}_{\mathcal{L}_1^f}(w)$  we have  $\bar{g}_{\mathcal{L}_1^f}(w(P)) = \bar{c}_{P_{i^*}}^f(w(P))$ . Consider route  $R' = (P_{i^*}, \bar{P})$ . The reduced cost of route  $R'$  can be computed as

$$\bar{c}(R', w(P)) = \bar{c}_{P_{i^*}}^f(w(P)) + d_{v_1^f j} + \bar{c}_{\bar{P}}^b(w(P)) = \bar{g}_{\mathcal{L}_1^f}(w(P)) + d_{v_1^f j} + \bar{c}_{\bar{P}}^b(w(P)). \quad (\text{EC.1})$$

From the hypothesis we have  $g_{L_1^f}(w(P)) \geq \bar{g}_{\mathcal{L}_1^f}(w(P))$ , and thus  $\bar{g}_{\mathcal{L}_1^f}(w(P)) < +\infty$  and  $w(P) \in [0, W_{i^*}^f]$ , so from expression (EC.1) we obtain:

$$\begin{aligned} \bar{c}(R', w(P)) &= \bar{g}_{\mathcal{L}_1^f}(w(P)) + d_{v_1^f j} + \bar{c}_{\bar{P}}^b(w(P)) \leq \\ &g_{L_1^f}(w(P)) + d_{v_1^f j} + \bar{c}_{\bar{P}}^b(w(P)) = \\ &\bar{c}_P^f(w(P)) + d_{v_1^f j} + \bar{c}_{\bar{P}}^b(w(P)) = \\ &\bar{c}(R, w(P)), \end{aligned}$$

and thus  $\bar{c}(R', w(P)) \leq \bar{c}(R, w(P))$  and path  $P$  and the associated label  $L_1^f$  can be safely discarded.

**Table EC.1** Example of a fractional  $\theta_{pr}$  solution satisfying the four branching rules

| Variables $\theta_{pr}$ | Routes and demand patterns (in brackets)                    |
|-------------------------|-------------------------------------------------------------|
| 0.5                     | 0(0) 10(1) 3(-1) 8(3) 1(-3) 11(0)                           |
| 1.0                     | 0(0) 6(1) 9(-1) 4(6) 9(-4) 5(-2) 2(5) 5(-5) 1(0) 11(0)      |
| 0.5                     | 0(0) 10(1) 3(-1) 8(6) 7(-6) 8(6.0) 7(-6.0) 8(3) 1(-3) 11(0) |

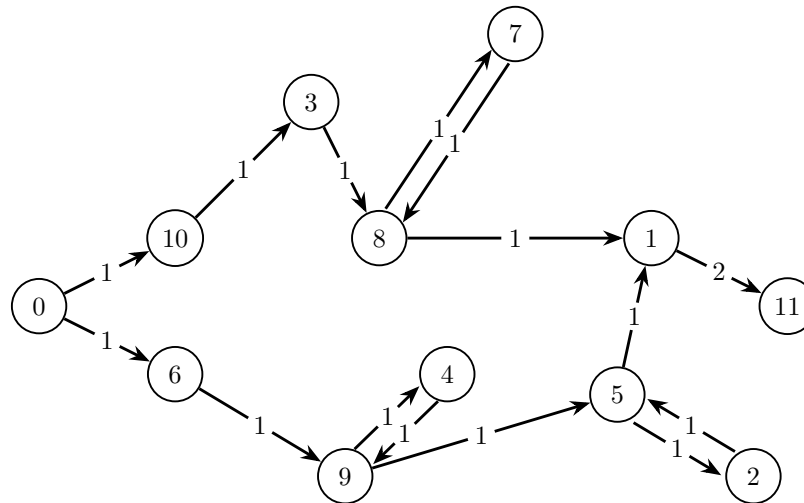**Figure EC.1** Support graph for the example of Table EC.1

## EC.2. Example of a fractional RMP solution satisfying the four branching rules

Figure EC.1 shows an example of a fractional RMP solution satisfying the four branching rules. The example involves an  $n = 10$  customers instance (numbered from 1 to 10) with initial and final depots indexed with numbers 0 and 11, respectively. The customers demands are  $d_1 = -3$ ,  $d_2 = 5$ ,  $d_3 = -1$ ,  $d_4 = 6$ ,  $d_5 = -7$ ,  $d_6 = 1$ ,  $d_7 = -6$ ,  $d_8 = 9$ ,  $d_9 = -5$ ,  $d_{10} = 1$ , and the vehicle capacity is  $Q = 6$ . The routes and demand patterns of the solution are shown in Table EC.1, where the numbers in parentheses show the demand patterns. The support graph of the solution associated with values  $\bar{w}_{ij}$  is depicted in Figure EC.1, where the number on each arc indicates the value of the corresponding variable  $\bar{w}_{ij}$ .

## EC.3. A three-index (TI) vehicle flow formulation

The three-index (TI) vehicle flow formulation is based on three-index vehicle flow formulations proposed for the basic Capacitated VRP (CVRP) (see, for example, Toth and Vigo 2014) and on the single commodity flow formulation described in Salazar-González and Santos-Hernández (2015). In this section, we describe the formulation for the multiple-visit, different-vehicle case, and then we briefly observe how the formulation can be extended to deal with the multiple-visit case.

For a given  $S \subseteq N$  we denote by  $A(S)$  the set of arcs with both end-vertices in  $S$ , i.e.,  $A(S) = \{(i, j) \in A : i, j \in S\}$ . Let  $x_{ij}^k$  be a binary variable that is equal to 1 if vehicle  $k$  traverses arc  $(i, j)$ ,

ec8

e-companion to **Author:** *A New Exact Algorithm for the SPDVRP*

and 0 otherwise, and  $y_i^k$  be a continuous variable representing the amount of products picked up (if positive) or delivered (if negative) to vertex  $i$  by vehicle  $k$ . In addition, let  $z_i^k$  be a nonnegative variable representing the amount of product carried by vehicle  $k$  when it leaves vertex  $i$ . The formulation is as follows.

$$(TI) \quad \min \sum_{k \in K} \sum_{(i,j) \in A} d_{ij} x_{ij}^k \quad (\text{EC.2a})$$

$$\text{s.t.} \quad \sum_{(0,i) \in A} x_{0i}^k = \sum_{(i,n') \in A} x_{in'}^k, \quad \forall k \in K, \quad (\text{EC.2b})$$

$$\sum_{(i,j) \in A} x_{ij}^k = \sum_{(j,i) \in A} x_{ji}^k, \quad \forall i \in V, k \in K, \quad (\text{EC.2c})$$

$$\sum_{k \in K} y_i^k = q_i, \quad \forall i \in V, \quad (\text{EC.2d})$$

$$y_i^k \leq \min\{q_i, Q\} \sum_{(i,j) \in A} x_{ij}^k, \quad \forall i \in N^+, k \in K, \quad (\text{EC.2e})$$

$$y_i^k \geq \max\{q_i, -Q\} \sum_{(i,j) \in A} x_{ij}^k, \quad \forall i \in N^-, k \in K, \quad (\text{EC.2f})$$

$$z_j^k \geq z_i^k + y_j^k + (x_{ij}^k - 1)(Q + 1), \quad \forall j \in N^+, (i,j) \in A, k \in K, \quad (\text{EC.2g})$$

$$z_j^k \leq z_i^k + y_j^k + (1 - x_{ij}^k)(Q + 1), \quad \forall j \in N^-, (i,j) \in A, k \in K, \quad (\text{EC.2h})$$

$$z_i^k \leq Q, \quad \forall i \in V, k \in K, \quad (\text{EC.2i})$$

$$\sum_{(i,j) \in A} t_{ij} x_{ij}^k \leq T, \quad \forall k \in K, \quad (\text{EC.2j})$$

$$\sum_{(i,j) \in A(S)} x_{ij}^k \leq |S| - 1, \quad \forall S \subseteq N, |S| > 1, k \in K, \quad (\text{EC.2k})$$

$$y_0^k = y_{n'}^k = 0, \quad \forall k \in K, \quad (\text{EC.2l})$$

$$x_{ij}^k \in \{0, 1\}, \quad \forall (i,j) \in A, k \in K, \quad (\text{EC.2m})$$

$$y_i^k \geq 0, \quad \forall i \in N^+, k \in K, \quad (\text{EC.2n})$$

$$y_i^k \leq 0, \quad \forall i \in N^-, k \in K, \quad (\text{EC.2o})$$

$$z_i^k \geq 0, \quad \forall i \in V, k \in K. \quad (\text{EC.2p})$$

The objective function (EC.2a) aims at minimizing the total routing cost of the vehicles. Constraints (EC.2b) and (EC.2c) are the flow conservation constraints for each vehicle at the depot and the customers, respectively. The satisfaction of the demand of each customer is guaranteed by constraints (EC.2d). Constraints (EC.2e) and (EC.2f) state that a vehicle can pick up or deliver the product at a customer only if the customer is visited by the vehicle, respectively. Constraints (EC.2g) and (EC.2h) define the values of flow variables  $z$  for the pickup and delivery customers, respectively. Constraints (EC.2i) and (EC.2j) are the capacity and the maximum duration constraints, respectively. Constraints (EC.2k) are the *subtour elimination* constraints.

Equations (EC.2l) impose that each vehicle departs from and arrives at the depot empty. Finally, constraints (EC.2m), (EC.2n), (EC.2o) and (EC.2p) state the domains of the decision variables.

Due to the presence of constraints (EC.2k), formulation TI imposes that a customer can be visited by the same vehicle at most once. Nevertheless, the formulation can be extended to deal with the case where a customer can also be visited more than once by the same vehicle, thus modeling the multiple visits case. Indeed, as done for example by Salazar-González and Santos-Hernández (2015) and Bulhões et al. (2018), multiple visits by the same vehicle can be modeled on an extended network where each vertex is associated with a number of vertices (representing possible visits) and each vertex can be visited at most once. A drawback of the resulting mathematical formulation is the large number of variables required by the underlying extended formulation, and for this reason the maximum number of visits to each vertex is generally fixed to a small value, such as less than two or three (see, for example, Salazar-González and Santos-Hernández 2015, Bulhões et al. 2018). The corresponding details are omitted for sake of brevity.

## EC.4. Additional computational details

### EC.4.1. Branching rules

Figures EC.2 and EC.3 give an overview of the use of the different branching rules adopted in EXM (see §5.3) for  $S_A$ ,  $S_B$  and  $S_C$  classes, respectively. The figures show the percentages of the nodes in which each rule is used over the total number of branching decisions. In Figure EC.2, the instances are grouped by the vehicle capacity  $Q$  and the maximum duration  $T$ , and the corresponding pairs are reported in the figures as  $[Q, T]$ . The corresponding detailed values can be found in the tables given in the e-companion.

The figures clearly show that branching on the number of vehicles visiting each customer (Rule 2) and branching on single arc (Rule 3) are among the most used rules. Rule 4, that is, branching on two consecutive arcs, is rarely used. Indeed, it is applied 16 and 14 times for classes  $S_A$ ,  $S_B$  and  $S_C$ , respectively (the corresponding percentages cannot be seen from the figures). As discussed in Section 5.3, the four branching rules are not sufficient to fulfil the integrality requirements. Nevertheless, in our experiments, it never once occurred that none of the rules could be applied.

### EC.4.2. Analysis of the SPDVRP solutions

In this section, we report some insights into the solutions computed by EXM regarding the number of routes and the type of routes generated.

Figures EC.4 and EC.5 reports the average number of routes in the optimal or best solutions found of classes  $S_A$ ,  $S_B$  and  $S_C$ , respectively. The data are grouped by the values of  $Q$  and  $T$  and the number of customers. The figures show that the average number of routes ranges between 1 and about 8. The numbers for different values of  $T$  show that the maximum duration constraints

ec10

e-companion to **Author:** *A New Exact Algorithm for the SPDVRP*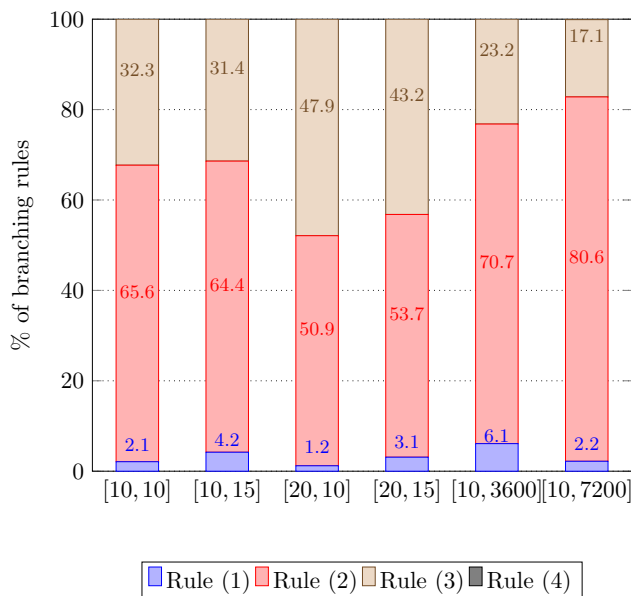

**Figure EC.2** Usage of branching decisions on  $S_A$  and  $S_B$  classes (values  $[Q, T]$  under each bar)

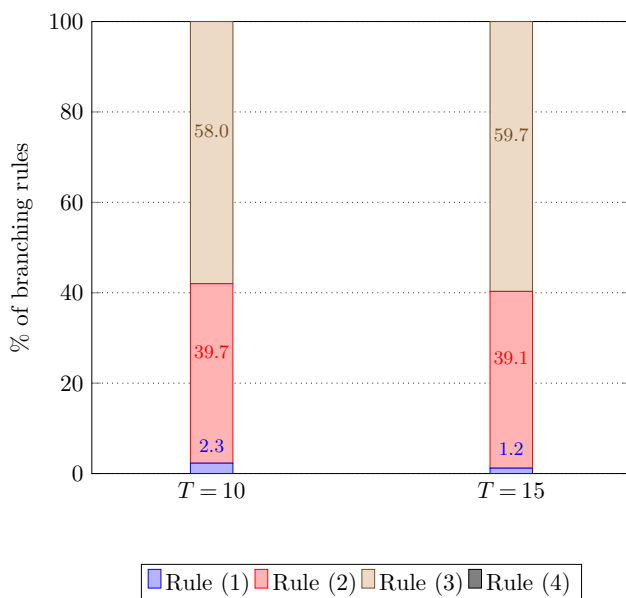

**Figure EC.3** Usage of branching decisions on  $S_C$  class

(either as a cardinality or time constraint) are generally tight, as shown by the lower average numbers for increasing values of  $T$ .

Finally, Figures EC.6 and EC.7 give an overview of the structure of the solutions computed by EXM based on the way the customers are visited. More specifically, we denote by “ $sv$ ” the total number of customers visited more than once by the same vehicle, and we denote by “ $dv$ ” the total number of customers visited more than once by different vehicles. Parameters  $sv$  and  $dv$  can also be used as a measure of the difficulty of the instances. Figure EC.6 shows relevant data about

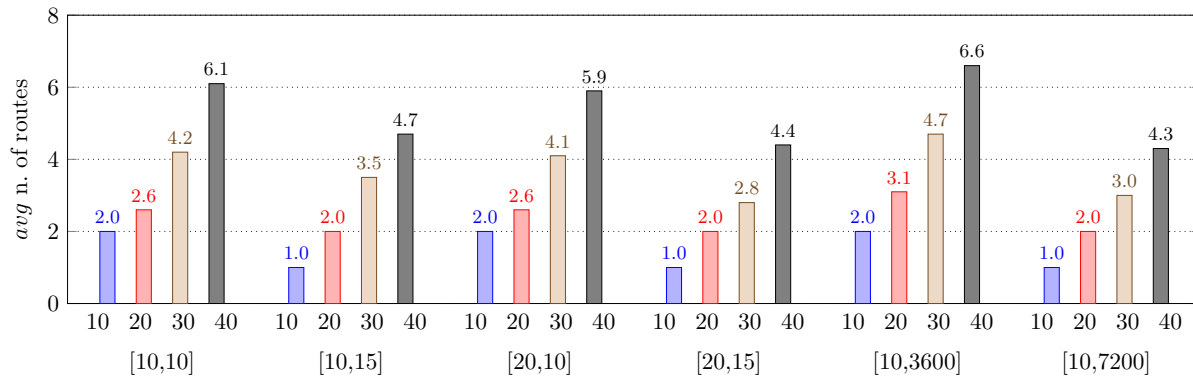

**Figure EC.4** Number of routes for the instances of classes  $S_A$  and  $S_B$  grouped by values  $[Q, T]$  and number of customers

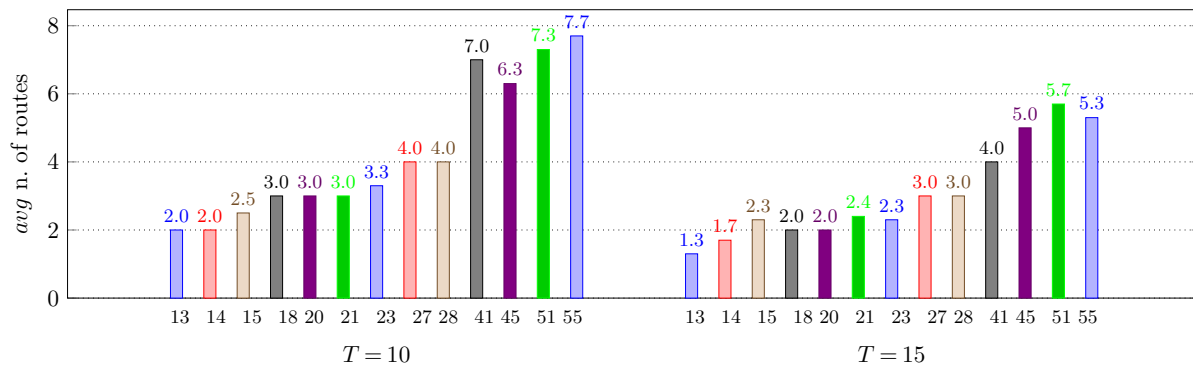

**Figure EC.5** Number of routes for the instances of class  $S_C$  grouped by the values of  $T$  and number of customers

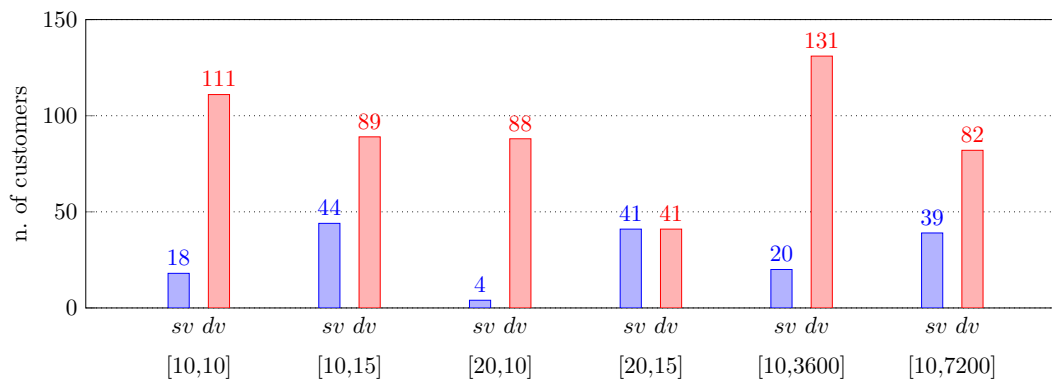

**Figure EC.6** Classes  $S_A$  and  $S_B$ : structure of the solutions grouped by values  $[Q, T]$

classes  $S_A$  and  $S_B$ , where the instances are grouped by values  $Q$  and  $T$ , whereas Figure EC.7 gives the details about class  $S_C$ , grouped by  $T = 10$  and  $T = 15$ .

The figures clearly point out that the solutions computed (which include both optimal and heuristic solutions) feature a higher number of customers visited by different vehicles (measure  $dv$ ) than the number of customers visited by the same vehicle (measure  $sv$ ), and that instances with tight  $Q$  and  $T$  values generally involve more split customers. The comparison between classes  $S_A$ ,

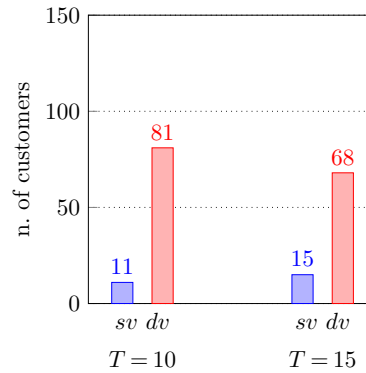

**Figure EC.7** Class  $S_C$ : structure of the solutions grouped by values of  $T$

$S_B$  and  $S_C$  shows that class  $S_C$  features a reduced number of split customers with respect to classes  $S_A$  and  $S_B$ , that is to say that the routes forming the solutions of class  $S_C$  are generally elementary and disjoint. In this case, the literature shows that for classical (non-split) vehicle routing problems, the LP-relaxation of the set-partitioning formulation provides very tight lower bounds (see Poggi and Uchoa 2014). These differences could explain the fact that, according to Table 3, EXM shows tighter bounds for class  $S_C$ .

## EC.5. Detailed computational results

This section reports detailed results about algorithm EXM on classes of instances  $S_A$ ,  $S_B$  and  $S_C$ .

Tables EC.2-EC.9 show the following details:

- Name of the instance (“Name”).
- Number of vehicles available (“ $|K|$ ”).
- Number of customers (“ $n$ ”).
- Vehicle capacity (“ $Q$ ”).
- Cost of the best solution found (“ $z^*$ ”) by EXM.
- Number of routes composing the solution (“ $rt$ ”).
- Percentage deviation of the upper bound computed by the primal heuristic (“ $\%UB$ ”), computed as  $100.0 \times UB/z^*$  where  $UB$  is the value of the upper bound.
- Time in seconds spent by the primal heuristic (“ $t_{UB}$ ”).
- Percentage deviation of lower bound derived from the LP-relaxation of formulation  $\overline{PB}$  (“ $\%LB$ ”), computed as  $100.0 \times LB/z^*$  where  $LB$  is the value of the lower bound.
- Percentage deviation of lower bound obtained from the column-and-row generation procedure (“ $\%LB_r$ ”), computed as  $100.0 \times LB_r/z^*$  where  $LB_r$  is the value of the lower bound.
- Number of cuts generated at the root node (“ $cut_r$ ”).
- Time in seconds spent by the pricing algorithm at the root node (“ $t_{PA}$ ”).
- Time in seconds spent to compute the lower bound at the root node (“ $t_r$ ”).

- Total number of cuts generated (“*cut*”).
- Number of tree nodes explored (“*node*”).
- Total computing time in seconds (“*t*”).

## EC.6. Detailed computational results about the pricing algorithms

This section reports detailed results about the comparison between the pricing algorithm of EXM and our implementation of the pricing algorithm proposed by Casazza et al. (2019).

Tables EC.10-EC.12 show the following details:

- Name of the instance (“Name”).
- Number of customers (“*n*”).
- Number of vehicles available (“ $|K|$ ”).
- Lower bound value (“*LB*”).
- For each pricing algorithm:
  - Time in seconds spent by the LP solver (“ $t_{LP}$ ”).
  - Time in seconds spent by the pricing algorithm (“ $t_{PA}$ ”).
  - Number of forward labels generated (“*fw*”).
  - Number of forward labels dominated (“*fd*”).
  - Number of backward labels generated (“*bw*”).
  - Number of backward labels dominated (“*bwd*”).

**Table EC.2** Detailed results on set  $S_A$  with  $Q = 10$  and  $T = 10$ 

| Name | $n$ | $ K $ | $z^*$   | $rt$ | %UB   | $t_{UB}$ | %LB  | %LB <sub>r</sub> | $cut_r$ | $t_{PA}$ | $t_r$ | cut  | node  | $t$     |
|------|-----|-------|---------|------|-------|----------|------|------------------|---------|----------|-------|------|-------|---------|
| n10a | 10  | 5     | 3719.0  | 2    | 105.2 | 0.8      | 86.3 | 95.2             | 63      | 0.2      | 0.4   | 67   | 27    | 1.5     |
| n10A | 10  | 5     | 3055.0  | 2    | 100.0 | 0.6      | 95.6 | 99.8             | 56      | 0.2      | 0.4   | 56   | 3     | 1.0     |
| n10b | 10  | 5     | 3192.0  | 2    | 100.0 | 0.8      | 84.2 | 99.8             | 24      | 0.3      | 0.4   | 24   | 3     | 1.3     |
| n10B | 10  | 5     | 3704.0  | 2    | 101.5 | 0.8      | 95.6 | 99.6             | 61      | 0.3      | 0.5   | 61   | 3     | 1.6     |
| n10c | 10  | 5     | 4239.0  | 2    | 100.0 | 0.4      | 98.7 | 100.0            | 8       | 0.2      | 0.3   | 8    | 1     | 0.9     |
| n10C | 10  | 5     | 3392.0  | 2    | 105.3 | 0.9      | 84.9 | 97.7             | 101     | 0.4      | 0.6   | 102  | 11    | 1.8     |
| n10d | 10  | 5     | 4497.0  | 2    | 102.4 | 0.7      | 86.7 | 96.5             | 28      | 0.3      | 0.4   | 34   | 35    | 2.0     |
| n10D | 10  | 5     | 3199.0  | 2    | 111.2 | 0.8      | 81.6 | 97.3             | 60      | 0.3      | 0.5   | 60   | 3     | 1.3     |
| n10e | 10  | 5     | 3823.0  | 2    | 100.0 | 0.5      | 89.0 | 100.0            | 87      | 0.4      | 0.6   | 87   | 1     | 1.2     |
| n10E | 10  | 5     | 4876.0  | 2    | 100.0 | 0.5      | 92.1 | 100.0            | 85      | 0.3      | 0.5   | 85   | 1     | 1.1     |
| n10f | 10  | 5     | 3468.0  | 2    | 126.4 | 1.0      | 76.6 | 86.0             | 65      | 0.4      | 0.6   | 109  | 1635  | 81.7    |
| n10F | 10  | 5     | 3796.0  | 2    | 100.0 | 0.6      | 96.5 | 99.8             | 53      | 0.2      | 0.4   | 53   | 3     | 1.3     |
| n10g | 10  | 5     | 4179.0  | 2    | 107.7 | 0.9      | 81.8 | 85.8             | 58      | 0.2      | 0.4   | 75   | 1953  | 102.8   |
| n10G | 10  | 5     | 3973.0  | 2    | 139.5 | 0.6      | 86.5 | 90.1             | 28      | 0.2      | 0.4   | 28   | 3     | 1.1     |
| n10h | 10  | 5     | 4168.0  | 2    | 100.0 | 0.6      | 88.4 | 96.3             | 66      | 0.2      | 0.4   | 67   | 13    | 1.3     |
| n10H | 10  | 5     | 3959.0  | 2    | 108.0 | 0.9      | 80.7 | 93.9             | 65      | 0.3      | 0.5   | 73   | 155   | 7.3     |
| n10i | 10  | 5     | 2645.0  | 2    | 145.0 | 0.7      | 91.7 | 95.6             | 56      | 0.2      | 0.4   | 58   | 9     | 1.3     |
| n10I | 10  | 5     | 3963.0  | 2    | 133.9 | 0.6      | 83.9 | 86.8             | 25      | 0.2      | 0.4   | 31   | 35    | 1.6     |
| n10j | 10  | 5     | 3453.0  | 2    | 115.0 | 0.6      | 94.0 | 94.6             | 19      | 0.2      | 0.4   | 21   | 17    | 1.2     |
| n10J | 10  | 5     | 3125.0  | 2    | 134.3 | 0.7      | 79.4 | 98.6             | 56      | 0.2      | 0.4   | 57   | 17    | 1.2     |
| n20A | 20  | 5     | 4826.0  | 2    | 115.7 | 2.5      | 94.0 | 99.3             | 172     | 0.6      | 1.0   | 176  | 13    | 4.2     |
| n20B | 20  | 5     | 5300.0  | 2    | 108.3 | 2.7      | 85.5 | 94.6             | 155     | 0.9      | 1.3   | 173  | 135   | 21.9    |
| n20C | 20  | 5     | 6508.0  | 3    | 115.3 | 4.9      | 92.0 | 96.2             | 486     | 1.3      | 1.9   | 604  | 8775  | 4591.5  |
| n20D | 20  | 5     | 6208.0  | 3    | 100.0 | 2.9      | 96.7 | 100.0            | 171     | 0.7      | 1.0   | 171  | 3     | 4.2     |
| n20E | 20  | 5     | 6491.0  | 3    | 114.2 | 4.1      | 88.6 | 98.2             | 367     | 1.1      | 1.7   | 401  | 261   | 85.7    |
| n20F | 20  | 5     | 5222.0  | 3    | 120.8 | 3.2      | 92.7 | 95.5             | 161     | 0.9      | 1.3   | 173  | 33    | 9.1     |
| n20G | 20  | 5     | 5795.0  | 3    | 122.6 | 3.3      | 86.0 | 94.3             | 190     | 1.0      | 1.3   | 277  | 1147  | 161.7   |
| n20H | 20  | 5     | 6207.0  | 2    | 127.8 | 4.1      | 85.8 | 93.1             | 340     | 1.0      | 1.5   | 358  | 547   | 77.8    |
| n20I | 20  | 5     | 5167.0  | 3    | 113.7 | 3.3      | 85.9 | 94.1             | 210     | 0.9      | 1.3   | 281  | 3521  | 789.5   |
| n20J | 20  | 5     | 4545.0  | 2    | 108.1 | 1.6      | 92.1 | 96.3             | 120     | 0.5      | 0.8   | 161  | 155   | 17.5    |
| n30A | 30  | 5     | 6865.0  | 4    | 105.0 | 15.0     | 92.5 | 97.3             | 1038    | 6.7      | 5.7   | 1252 | 5305  | 4637.3  |
| n30B | 30  | 5     | 6939.0  | 3    | 108.5 | 5.5      | 91.2 | 97.7             | 387     | 1.9      | 2.6   | 454  | 445   | 237.1   |
| n30C | 30  | 5     | 8613.0  | 5    | 100.0 | 16.6     | 73.0 | 79.3             | 594     | 8.5      | 3.2   | 1221 | 16991 | 10800.0 |
| n30D | 30  | 5     | 9314.0  | 5    | 100.0 | 8.2      | 66.6 | 71.4             | 534     | 2.3      | 2.8   | 923  | 16603 | 10800.0 |
| n30E | 30  | 5     | 6840.0  | 3    | 114.8 | 7.8      | 86.3 | 94.7             | 486     | 1.9      | 2.4   | 778  | 1039  | 1095.2  |
| n30F | 30  | 5     | 6715.0  | 4    | 106.2 | 7.5      | 88.4 | 95.4             | 319     | 2.2      | 2.9   | 502  | 2735  | 943.8   |
| n30G | 30  | 5     | 9462.0  | 4    | 105.3 | 12.8     | 90.7 | 97.0             | 778     | 3.3      | 4.5   | 1228 | 13401 | 10360.7 |
| n30H | 30  | 5     | 8182.0  | 5    | 100.0 | 7.3      | 75.1 | 79.8             | 452     | 2.4      | 3.0   | 943  | 17257 | 10800.0 |
| n30I | 30  | 5     | 6602.0  | 4    | 100.0 | 5.8      | 82.8 | 87.9             | 335     | 1.6      | 2.2   | 788  | 18217 | 10800.0 |
| n30J | 30  | 5     | 8753.0  | 5    | 100.0 | 9.0      | 70.7 | 73.2             | 365     | 3.2      | 2.1   | 1702 | 19701 | 10800.0 |
| n40A | 40  | 8     | 10430.0 | 6    | 100.0 | 18.7     | 71.5 | 74.4             | 789     | 3.4      | 4.2   | 1604 | 14157 | 10800.0 |
| n40B | 40  | 8     | 9805.0  | 7    | 100.0 | 18.9     | 69.1 | 72.4             | 736     | 3.1      | 3.7   | 1334 | 14171 | 10800.0 |
| n40C | 40  | 8     | 9097.0  | 5    | 100.0 | 12.4     | 81.4 | 85.9             | 818     | 3.3      | 4.4   | 1201 | 5011  | 10800.0 |
| n40D | 40  | 8     | 9837.0  | 5    | 100.0 | 19.7     | 80.9 | 86.2             | 964     | 3.9      | 5.0   | 1387 | 11993 | 10800.0 |
| n40E | 40  | 8     | 11882.0 | 7    | 100.0 | 13.9     | 55.8 | 61.2             | 792     | 2.4      | 3.0   | 1409 | 11447 | 10800.0 |
| n40F | 40  | 8     | 9275.0  | 5    | 100.0 | 15.8     | 79.5 | 85.2             | 711     | 3.4      | 4.2   | 1265 | 12583 | 10800.0 |
| n40G | 40  | 8     | 11017.0 | 7    | 100.0 | 16.5     | 73.7 | 76.7             | 878     | 3.6      | 4.5   | 1593 | 13383 | 10800.0 |
| n40H | 40  | 8     | 10129.0 | 7    | 100.0 | 15.3     | 72.9 | 75.0             | 869     | 3.0      | 3.6   | 1183 | 13475 | 10800.0 |
| n40I | 40  | 8     | 11222.0 | 6    | 100.0 | 14.4     | 66.1 | 70.2             | 798     | 3.1      | 3.9   | 1285 | 13119 | 10800.0 |
| n40J | 40  | 8     | 9265.0  | 6    | 100.0 | 11.8     | 73.8 | 77.4             | 574     | 2.5      | 3.1   | 1538 | 14155 | 10800.0 |

**Table EC.3** Detailed results on set  $S_A$  with  $Q = 10$  and  $T = 15$ 

| Name | $n$ | $ K $ | $z^*$   | $rt$ | $\%UB$ | $t_{UB}$ | $\%LB$ | $\%LB_r$ | $cut_r$ | $t_{PA}$ | $t_r$ | $cut$ | $node$ | $t$     |
|------|-----|-------|---------|------|--------|----------|--------|----------|---------|----------|-------|-------|--------|---------|
| n10a | 10  | 5     | 3484.0  | 1    | 148.6  | 1.2      | 90.3   | 100.0    | 52      | 0.5      | 0.7   | 52    | 3      | 2.0     |
| n10A | 10  | 5     | 2994.0  | 1    | 100.0  | 0.2      | 96.4   | 100.0    | 28      | 0.1      | 0.1   | 28    | 1      | 0.5     |
| n10b | 10  | 5     | 3122.0  | 1    | 100.0  | 0.4      | 84.7   | 100.0    | 24      | 0.1      | 0.2   | 24    | 1      | 0.6     |
| n10B | 10  | 5     | 3671.0  | 1    | 100.0  | 0.4      | 96.1   | 100.0    | 60      | 0.1      | 0.2   | 60    | 1      | 0.6     |
| n10c | 10  | 5     | 4226.0  | 1    | 100.0  | 0.1      | 98.0   | 100.0    | 16      | 0.0      | 0.0   | 16    | 1      | 0.2     |
| n10C | 10  | 5     | 3324.0  | 1    | 135.4  | 1.0      | 84.4   | 99.2     | 136     | 0.3      | 0.4   | 138   | 9      | 1.5     |
| n10d | 10  | 5     | 4238.0  | 1    | 100.0  | 0.3      | 89.0   | 100.0    | 28      | 0.1      | 0.1   | 28    | 1      | 0.5     |
| n10D | 10  | 5     | 3071.0  | 1    | 100.0  | 0.5      | 80.0   | 100.0    | 96      | 0.3      | 0.4   | 96    | 1      | 0.5     |
| n10e | 10  | 5     | 3816.0  | 1    | 100.0  | 0.5      | 88.3   | 100.0    | 77      | 0.2      | 0.2   | 77    | 1      | 0.2     |
| n10E | 10  | 5     | 4828.0  | 1    | 100.0  | 0.5      | 90.6   | 100.0    | 84      | 0.2      | 0.3   | 84    | 1      | 0.2     |
| n10f | 10  | 5     | 2996.0  | 1    | 170.4  | 0.6      | 83.4   | 98.0     | 67      | 0.2      | 0.3   | 68    | 13     | 2.7     |
| n10F | 10  | 5     | 3758.0  | 1    | 100.0  | 0.3      | 94.2   | 100.0    | 68      | 0.1      | 0.2   | 68    | 1      | 0.5     |
| n10g | 10  | 5     | 3685.0  | 1    | 134.9  | 0.3      | 85.8   | 93.1     | 61      | 0.1      | 0.1   | 71    | 359    | 43.9    |
| n10G | 10  | 5     | 3325.0  | 1    | 100.0  | 0.2      | 92.8   | 100.0    | 16      | 0.1      | 0.1   | 16    | 1      | 0.4     |
| n10h | 10  | 5     | 3960.0  | 1    | 126.3  | 0.3      | 87.8   | 99.8     | 58      | 0.1      | 0.1   | 58    | 3      | 0.7     |
| n10H | 10  | 5     | 3813.0  | 1    | 183.5  | 1.0      | 79.9   | 95.3     | 69      | 0.3      | 0.4   | 92    | 695    | 111.7   |
| n10i | 10  | 5     | 2390.0  | 1    | 100.0  | 0.2      | 96.4   | 100.0    | 23      | 0.1      | 0.1   | 23    | 1      | 0.4     |
| n10I | 10  | 5     | 3287.0  | 1    | 174.7  | 0.3      | 92.4   | 98.2     | 35      | 0.1      | 0.2   | 35    | 5      | 1.5     |
| n10j | 10  | 5     | 3249.0  | 1    | 122.3  | 0.2      | 97.5   | 98.9     | 44      | 0.1      | 0.1   | 44    | 11     | 1.6     |
| n10J | 10  | 5     | 3060.0  | 1    | 100.0  | 0.2      | 70.8   | 100.0    | 40      | 0.1      | 0.1   | 40    | 1      | 0.4     |
| n20A | 20  | 5     | 4713.0  | 2    | 148.2  | 2.9      | 90.7   | 99.2     | 178     | 1.0      | 1.3   | 179   | 9      | 8.9     |
| n20B | 20  | 5     | 4992.0  | 2    | 102.6  | 3.9      | 83.9   | 96.8     | 191     | 1.6      | 1.9   | 203   | 91     | 45.1    |
| n20C | 20  | 5     | 6110.0  | 2    | 133.4  | 12.9     | 93.6   | 99.0     | 680     | 5.0      | 5.8   | 702   | 371    | 2193.8  |
| n20D | 20  | 5     | 6146.0  | 2    | 103.4  | 6.8      | 93.0   | 99.3     | 372     | 2.0      | 2.5   | 396   | 135    | 155.4   |
| n20E | 20  | 5     | 6339.0  | 2    | 115.3  | 12.9     | 88.3   | 99.0     | 562     | 5.4      | 6.4   | 589   | 101    | 171.2   |
| n20F | 20  | 5     | 4851.0  | 2    | 157.2  | 3.3      | 93.0   | 97.3     | 258     | 1.1      | 1.3   | 272   | 25     | 19.9    |
| n20G | 20  | 5     | 5334.0  | 2    | 101.8  | 3.9      | 87.1   | 97.3     | 201     | 1.4      | 1.7   | 203   | 9      | 14.1    |
| n20H | 20  | 5     | 5847.0  | 2    | 140.1  | 5.2      | 84.7   | 95.1     | 327     | 1.7      | 2.1   | 405   | 1967   | 863.9   |
| n20I | 20  | 5     | 4797.0  | 2    | 125.4  | 7.3      | 85.8   | 97.3     | 483     | 1.5      | 2.1   | 529   | 307    | 263.7   |
| n20J | 20  | 5     | 4402.0  | 2    | 117.0  | 1.6      | 90.2   | 95.2     | 184     | 0.3      | 0.4   | 193   | 39     | 8.7     |
| n30A | 30  | 5     | 8367.0  | 4    | 100.0  | 54.2     | 70.1   | 75.5     | 1631    | 17.3     | 20.8  | 1796  | 2907   | 10800.0 |
| n30B | 30  | 5     | 6460.0  | 2    | 109.3  | 15.0     | 92.6   | 99.4     | 826     | 5.7      | 7.2   | 831   | 65     | 436.8   |
| n30C | 30  | 5     | 7676.0  | 4    | 100.0  | 42.7     | 74.7   | 83.0     | 1099    | 9.1      | 10.7  | 1361  | 6651   | 10800.0 |
| n30D | 30  | 5     | 7403.0  | 4    | 100.0  | 48.9     | 73.7   | 82.6     | 1242    | 10.5     | 11.3  | 1757  | 6345   | 10800.0 |
| n30E | 30  | 5     | 6286.0  | 2    | 126.3  | 19.2     | 83.9   | 94.9     | 632     | 4.5      | 5.3   | 1141  | 4065   | 10800.0 |
| n30F | 30  | 5     | 6205.0  | 3    | 124.6  | 19.3     | 86.4   | 94.4     | 556     | 7.4      | 9.1   | 1012  | 8487   | 10800.0 |
| n30G | 30  | 5     | 9163.0  | 3    | 117.6  | 64.1     | 88.8   | 97.1     | 1270    | 15.8     | 18.8  | 1738  | 3347   | 10800.0 |
| n30H | 30  | 5     | 9191.0  | 5    | 100.0  | 16.0     | 60.7   | 65.0     | 617     | 4.5      | 5.4   | 1249  | 6897   | 10800.0 |
| n30I | 30  | 8     | 7510.0  | 5    | 100.0  | 12.4     | 65.2   | 71.6     | 713     | 3.5      | 4.9   | 868   | 4565   | 10800.0 |
| n30J | 30  | 8     | 6204.0  | 3    | 113.6  | 11.4     | 89.7   | 95.3     | 638     | 2.7      | 3.4   | 1000  | 3351   | 4142.6  |
| n40A | 40  | 8     | 12046.0 | 6    | 100.0  | 44.5     | 56.2   | 59.2     | 1204    | 10.5     | 12.7  | 1566  | 3811   | 10800.0 |
| n40B | 40  | 8     | 7989.0  | 4    | 100.0  | 37.9     | 73.2   | 78.9     | 780     | 6.3      | 7.1   | 1193  | 5771   | 10800.0 |
| n40C | 40  | 8     | 9431.0  | 5    | 100.0  | 71.8     | 72.1   | 78.1     | 1395    | 26.9     | 31.5  | 1525  | 1895   | 10800.0 |
| n40D | 40  | 8     | 8354.0  | 3    | 100.0  | 99.2     | 87.1   | 95.7     | 991     | 35.0     | 38.3  | 1187  | 1511   | 10800.0 |
| n40E | 40  | 8     | 11064.0 | 6    | 100.0  | 34.1     | 51.9   | 59.4     | 805     | 7.4      | 8.8   | 1166  | 4267   | 10800.0 |
| n40F | 40  | 8     | 9281.0  | 5    | 100.0  | 71.1     | 71.4   | 78.3     | 1395    | 17.5     | 19.7  | 1788  | 2557   | 10800.0 |
| n40G | 40  | 8     | 8150.0  | 4    | 104.4  | 31.1     | 88.8   | 93.9     | 800     | 9.5      | 11.1  | 1263  | 2953   | 10800.0 |
| n40H | 40  | 8     | 9224.0  | 5    | 100.0  | 34.5     | 70.3   | 73.2     | 945     | 9.4      | 11.5  | 1157  | 4329   | 10800.0 |
| n40I | 40  | 8     | 10135.0 | 4    | 100.0  | 45.5     | 64.8   | 71.2     | 879     | 10.7     | 11.9  | 1561  | 3809   | 10800.0 |
| n40J | 40  | 8     | 10608.0 | 5    | 100.0  | 35.7     | 56.1   | 61.5     | 1011    | 5.0      | 5.9   | 1313  | 5747   | 10800.0 |

**Table EC.4** Detailed results on set  $S_A$  with  $Q = 20$  and  $T = 10$ 

| Name | $n$ | $ K $ | $z^*$   | $rt$ | %UB   | $t_{UB}$ | %LB  | %LB <sub>r</sub> | $cut_r$ | $t_{PA}$ | $t_r$ | $cut$ | $node$ | $t$     |
|------|-----|-------|---------|------|-------|----------|------|------------------|---------|----------|-------|-------|--------|---------|
| n10a | 10  | 5     | 3524.0  | 2    | 111.6 | 0.7      | 86.4 | 94.5             | 31      | 0.3      | 0.4   | 33    | 13     | 1.4     |
| n10A | 10  | 5     | 2936.0  | 2    | 117.6 | 0.6      | 84.7 | 87.3             | 24      | 0.3      | 0.4   | 24    | 5      | 1.1     |
| n10b | 10  | 5     | 3192.0  | 2    | 115.8 | 0.7      | 82.4 | 92.6             | 13      | 0.3      | 0.4   | 13    | 3      | 2.8     |
| n10B | 10  | 5     | 3587.0  | 2    | 100.8 | 0.8      | 86.4 | 88.5             | 36      | 0.3      | 0.4   | 36    | 3      | 1.2     |
| n10c | 10  | 5     | 3324.0  | 2    | 115.3 | 0.7      | 94.9 | 94.9             | 0       | 0.3      | 0.5   | 0     | 3      | 1.9     |
| n10C | 10  | 5     | 3013.0  | 2    | 118.2 | 1.0      | 82.0 | 91.1             | 32      | 0.3      | 0.5   | 32    | 3      | 2.4     |
| n10d | 10  | 5     | 4043.0  | 2    | 109.5 | 0.7      | 86.3 | 88.5             | 24      | 0.3      | 0.5   | 24    | 43     | 3.8     |
| n10D | 10  | 5     | 2988.0  | 2    | 104.0 | 0.7      | 84.6 | 97.9             | 23      | 0.3      | 0.4   | 23    | 3      | 1.3     |
| n10e | 10  | 5     | 3130.0  | 2    | 117.7 | 1.5      | 87.8 | 92.4             | 38      | 0.4      | 0.7   | 39    | 25     | 3.0     |
| n10E | 10  | 5     | 3617.0  | 2    | 100.0 | 0.8      | 95.1 | 99.6             | 57      | 0.3      | 0.5   | 57    | 3      | 1.4     |
| n10f | 10  | 5     | 3468.0  | 2    | 127.1 | 1.5      | 74.7 | 83.6             | 42      | 0.4      | 0.5   | 148   | 2613   | 160.1   |
| n10F | 10  | 5     | 3601.0  | 2    | 102.3 | 0.5      | 94.2 | 96.1             | 12      | 0.2      | 0.4   | 12    | 3      | 1.5     |
| n10g | 10  | 5     | 4179.0  | 2    | 108.1 | 0.9      | 77.2 | 83.1             | 32      | 0.3      | 0.4   | 90    | 2011   | 126.4   |
| n10G | 10  | 5     | 3763.0  | 2    | 129.8 | 0.6      | 84.3 | 88.6             | 12      | 0.3      | 0.4   | 12    | 3      | 0.8     |
| n10h | 10  | 5     | 3885.0  | 2    | 127.6 | 0.8      | 89.8 | 91.8             | 28      | 0.3      | 0.5   | 30    | 17     | 2.2     |
| n10H | 10  | 5     | 3600.0  | 2    | 114.3 | 1.0      | 78.9 | 85.5             | 34      | 0.3      | 0.5   | 37    | 89     | 4.9     |
| n10i | 10  | 5     | 2548.0  | 2    | 123.2 | 0.5      | 84.7 | 93.8             | 18      | 0.2      | 0.3   | 19    | 9      | 2.0     |
| n10I | 10  | 5     | 3963.0  | 2    | 133.9 | 0.9      | 82.8 | 86.3             | 24      | 0.3      | 0.5   | 25    | 49     | 4.4     |
| n10j | 10  | 5     | 3172.0  | 2    | 121.9 | 0.9      | 89.6 | 95.3             | 26      | 0.3      | 0.5   | 27    | 15     | 2.9     |
| n10J | 10  | 5     | 2992.0  | 1    | 100.0 | 0.5      | 80.6 | 100.0            | 20      | 0.2      | 0.4   | 20    | 1      | 0.9     |
| n20A | 20  | 5     | 4380.0  | 2    | 124.4 | 1.3      | 87.8 | 89.9             | 69      | 0.5      | 0.7   | 466   | 4431   | 1513.9  |
| n20B | 20  | 5     | 4980.0  | 3    | 110.1 | 2.8      | 86.0 | 92.8             | 76      | 1.0      | 1.2   | 177   | 1245   | 435.0   |
| n20C | 20  | 5     | 5453.0  | 3    | 122.1 | 3.4      | 89.6 | 91.1             | 165     | 0.8      | 1.1   | 1565  | 22505  | 9362.2  |
| n20D | 20  | 5     | 5021.0  | 3    | 108.6 | 2.3      | 91.9 | 96.4             | 118     | 0.9      | 1.1   | 127   | 433    | 73.8    |
| n20E | 20  | 5     | 4998.0  | 2    | 100.0 | 1.8      | 94.6 | 97.1             | 64      | 0.7      | 0.9   | 67    | 23     | 4.0     |
| n20F | 20  | 5     | 5031.0  | 3    | 124.5 | 4.6      | 88.5 | 93.5             | 111     | 1.1      | 1.4   | 114   | 87     | 16.4    |
| n20G | 20  | 5     | 5304.0  | 3    | 127.9 | 3.2      | 83.9 | 90.9             | 99      | 0.9      | 1.1   | 151   | 609    | 60.6    |
| n20H | 20  | 5     | 5312.0  | 2    | 113.9 | 2.2      | 91.5 | 92.0             | 41      | 0.6      | 0.7   | 105   | 143    | 148.3   |
| n20I | 20  | 5     | 4793.0  | 3    | 128.9 | 1.9      | 84.9 | 89.8             | 84      | 0.6      | 0.8   | 604   | 5179   | 1034.4  |
| n20J | 20  | 5     | 4139.0  | 2    | 103.6 | 1.2      | 91.3 | 98.6             | 52      | 0.4      | 0.6   | 55    | 21     | 5.1     |
| n30A | 30  | 5     | 6131.0  | 4    | 115.2 | 11.3     | 92.7 | 93.8             | 96      | 7.5      | 5.3   | 372   | 10261  | 5259.8  |
| n30B | 30  | 5     | 7278.0  | 5    | 100.0 | 4.3      | 74.3 | 76.5             | 88      | 1.4      | 1.6   | 959   | 10923  | 10800.0 |
| n30C | 30  | 5     | 6311.0  | 4    | 100.0 | 6.8      | 86.4 | 90.4             | 140     | 2.3      | 2.7   | 1127  | 12551  | 10800.0 |
| n30D | 30  | 5     | 6156.0  | 4    | 125.8 | 7.1      | 88.3 | 92.7             | 173     | 1.9      | 2.2   | 673   | 16181  | 10800.0 |
| n30E | 30  | 5     | 7884.0  | 4    | 100.0 | 5.7      | 65.9 | 70.3             | 149     | 1.6      | 1.9   | 678   | 4241   | 10800.0 |
| n30F | 30  | 5     | 7374.0  | 4    | 100.0 | 7.6      | 71.1 | 75.9             | 181     | 2.8      | 2.7   | 1394  | 16959  | 10800.0 |
| n30G | 30  | 5     | 7273.0  | 3    | 109.4 | 6.9      | 86.7 | 95.1             | 219     | 2.6      | 3.1   | 506   | 929    | 1865.2  |
| n30H | 30  | 5     | 6058.0  | 4    | 100.0 | 5.3      | 83.6 | 85.6             | 137     | 1.8      | 2.2   | 1284  | 15379  | 10800.0 |
| n30I | 30  | 5     | 8452.0  | 5    | 100.0 | 10.1     | 59.6 | 61.1             | 127     | 5.8      | 2.0   | 1223  | 16985  | 10800.0 |
| n30J | 30  | 5     | 7173.0  | 4    | 100.0 | 6.2      | 74.3 | 78.9             | 144     | 2.0      | 2.3   | 1247  | 14089  | 10800.0 |
| n40A | 40  | 8     | 8575.0  | 5    | 100.0 | 12.7     | 76.8 | 77.6             | 215     | 3.4      | 3.7   | 1155  | 10313  | 10800.0 |
| n40B | 40  | 8     | 9883.0  | 6    | 100.0 | 17.9     | 66.5 | 67.7             | 229     | 3.4      | 3.6   | 1221  | 10081  | 10800.0 |
| n40C | 40  | 8     | 6390.0  | 4    | 128.2 | 10.7     | 94.8 | 97.9             | 316     | 2.4      | 2.6   | 362   | 629    | 1570.4  |
| n40D | 40  | 8     | 10531.0 | 7    | 100.0 | 14.3     | 64.9 | 66.7             | 311     | 2.1      | 2.2   | 775   | 8337   | 10800.0 |
| n40E | 40  | 8     | 10573.0 | 8    | 100.0 | 12.6     | 59.1 | 62.3             | 286     | 2.2      | 2.5   | 643   | 10033  | 10800.0 |
| n40F | 40  | 8     | 10398.0 | 6    | 100.0 | 14.9     | 61.4 | 62.6             | 249     | 2.3      | 2.4   | 1077  | 8603   | 10800.0 |
| n40G | 40  | 8     | 10981.0 | 7    | 100.0 | 21.3     | 64.6 | 66.5             | 455     | 3.9      | 4.3   | 921   | 10263  | 10800.0 |
| n40H | 40  | 8     | 9871.0  | 7    | 100.0 | 17.8     | 66.7 | 67.6             | 330     | 2.9      | 3.1   | 1096  | 8609   | 10800.0 |
| n40I | 40  | 8     | 8394.0  | 5    | 100.0 | 15.3     | 75.9 | 78.2             | 319     | 2.3      | 2.5   | 663   | 6897   | 10800.0 |
| n40J | 40  | 8     | 6739.0  | 4    | 158.0 | 18.6     | 90.9 | 94.8             | 330     | 2.2      | 2.3   | 398   | 431    | 1441.6  |

**Table EC.5** Detailed results on set  $S_A$  with  $Q = 20$  and  $T = 15$ 

| Name | $n$ | $ K $ | $z^*$   | $rt$ | %UB   | $t_{UB}$ | %LB  | %LB <sub>r</sub> | $cut_r$ | $t_{PA}$ | $t_r$ | $cut$ | $node$ | $t$     |
|------|-----|-------|---------|------|-------|----------|------|------------------|---------|----------|-------|-------|--------|---------|
| n10a | 10  | 5     | 3292.0  | 1    | 146.2 | 0.8      | 86.3 | 98.4             | 34      | 0.4      | 0.5   | 35    | 17     | 3.5     |
| n10A | 10  | 5     | 2471.0  | 1    | 146.3 | 0.3      | 94.8 | 99.3             | 35      | 0.1      | 0.2   | 35    | 3      | 3.3     |
| n10b | 10  | 5     | 2876.0  | 1    | 100.0 | 0.5      | 86.8 | 100.0            | 32      | 0.2      | 0.3   | 32    | 1      | 0.8     |
| n10B | 10  | 5     | 3066.0  | 1    | 100.0 | 0.6      | 93.1 | 100.0            | 44      | 0.2      | 0.3   | 44    | 1      | 0.9     |
| n10c | 10  | 5     | 2948.0  | 1    | 100.0 | 0.1      | 99.7 | 99.7             | 0       | 0.1      | 0.1   | 0     | 3      | 0.2     |
| n10C | 10  | 5     | 2674.0  | 1    | 142.9 | 0.7      | 85.5 | 99.5             | 60      | 0.3      | 0.4   | 60    | 3      | 1.8     |
| n10d | 10  | 5     | 3438.0  | 1    | 100.0 | 0.2      | 98.3 | 100.0            | 24      | 0.1      | 0.1   | 24    | 1      | 0.5     |
| n10D | 10  | 5     | 2885.0  | 1    | 134.0 | 0.6      | 79.4 | 98.8             | 34      | 0.2      | 0.2   | 34    | 9      | 2.8     |
| n10e | 10  | 5     | 2823.0  | 1    | 100.0 | 0.5      | 90.9 | 100.0            | 76      | 0.2      | 0.2   | 76    | 1      | 0.8     |
| n10E | 10  | 5     | 3569.0  | 1    | 100.0 | 0.3      | 94.4 | 100.0            | 56      | 0.1      | 0.2   | 56    | 1      | 0.5     |
| n10f | 10  | 5     | 2996.0  | 1    | 163.1 | 0.4      | 78.9 | 94.8             | 32      | 0.2      | 0.2   | 45    | 91     | 10.2    |
| n10F | 10  | 5     | 3315.0  | 1    | 100.0 | 0.2      | 94.8 | 100.0            | 18      | 0.1      | 0.1   | 18    | 1      | 0.4     |
| n10g | 10  | 5     | 3685.0  | 1    | 122.1 | 0.6      | 80.2 | 89.4             | 30      | 0.2      | 0.2   | 77    | 851    | 144.7   |
| n10G | 10  | 5     | 3115.0  | 1    | 100.0 | 0.3      | 86.9 | 100.0            | 25      | 0.1      | 0.1   | 25    | 1      | 0.5     |
| n10h | 10  | 5     | 3388.0  | 1    | 100.0 | 0.2      | 97.1 | 100.0            | 15      | 0.1      | 0.1   | 15    | 1      | 0.4     |
| n10H | 10  | 5     | 3104.0  | 1    | 255.3 | 0.4      | 82.6 | 92.3             | 34      | 0.1      | 0.2   | 38    | 119    | 12.1    |
| n10i | 10  | 5     | 2279.0  | 1    | 100.0 | 0.3      | 85.3 | 100.0            | 26      | 0.1      | 0.1   | 26    | 1      | 0.5     |
| n10I | 10  | 5     | 3287.0  | 1    | 174.7 | 0.4      | 89.9 | 98.0             | 27      | 0.2      | 0.2   | 29    | 21     | 3.7     |
| n10j | 10  | 5     | 2932.0  | 1    | 100.0 | 0.3      | 92.6 | 100.0            | 28      | 0.1      | 0.2   | 28    | 1      | 0.5     |
| n10J | 10  | 5     | 2992.0  | 1    | 100.0 | 0.2      | 69.0 | 100.0            | 25      | 0.1      | 0.1   | 25    | 1      | 0.4     |
| n20A | 20  | 5     | 4038.0  | 2    | 107.9 | 1.0      | 85.8 | 89.4             | 46      | 0.5      | 0.5   | 590   | 9653   | 3839.7  |
| n20B | 20  | 5     | 4662.0  | 2    | 138.5 | 3.9      | 80.1 | 90.8             | 92      | 1.1      | 1.2   | 1423  | 13979  | 10800.0 |
| n20C | 20  | 5     | 4845.0  | 2    | 147.3 | 5.0      | 90.8 | 94.9             | 156     | 1.8      | 2.1   | 189   | 1069   | 955.3   |
| n20D | 20  | 5     | 4801.0  | 2    | 108.1 | 3.1      | 88.4 | 98.5             | 182     | 1.2      | 1.4   | 185   | 67     | 93.5    |
| n20E | 20  | 5     | 4755.0  | 2    | 126.6 | 2.8      | 90.7 | 98.3             | 159     | 1.1      | 1.3   | 159   | 3      | 19.7    |
| n20F | 20  | 5     | 4620.0  | 2    | 153.3 | 3.5      | 88.0 | 93.8             | 81      | 1.3      | 1.4   | 100   | 241    | 134.3   |
| n20G | 20  | 5     | 4814.0  | 2    | 116.5 | 3.2      | 82.1 | 92.6             | 108     | 1.2      | 1.3   | 186   | 1973   | 1084.2  |
| n20H | 20  | 5     | 4869.0  | 2    | 179.4 | 3.3      | 87.9 | 89.7             | 123     | 0.5      | 0.6   | 201   | 521    | 244.4   |
| n20I | 20  | 5     | 4327.0  | 2    | 117.4 | 3.2      | 83.9 | 94.5             | 119     | 1.1      | 1.3   | 149   | 345    | 257.6   |
| n20J | 20  | 5     | 4098.0  | 2    | 112.0 | 2.2      | 82.3 | 92.8             | 61      | 1.0      | 1.3   | 70    | 127    | 25.8    |
| n30A | 30  | 5     | 5759.0  | 3    | 105.8 | 10.0     | 85.7 | 87.3             | 297     | 3.8      | 4.4   | 1118  | 10381  | 10800.0 |
| n30B | 30  | 5     | 5145.0  | 2    | 150.5 | 11.2     | 91.2 | 96.9             | 228     | 3.1      | 3.3   | 293   | 891    | 1515.4  |
| n30C | 30  | 5     | 6024.0  | 3    | 100.0 | 12.1     | 79.1 | 85.3             | 185     | 3.5      | 3.8   | 470   | 1061   | 10800.0 |
| n30D | 30  | 5     | 6953.0  | 4    | 100.0 | 12.3     | 66.4 | 73.2             | 265     | 3.0      | 3.4   | 523   | 1559   | 10800.0 |
| n30E | 30  | 5     | 5192.0  | 2    | 181.4 | 12.2     | 86.1 | 94.3             | 251     | 2.4      | 2.6   | 1014  | 6973   | 10800.0 |
| n30F | 30  | 5     | 8206.0  | 4    | 100.0 | 15.8     | 53.9 | 59.8             | 261     | 2.9      | 3.1   | 997   | 11295  | 10800.0 |
| n30G | 30  | 5     | 9029.0  | 4    | 100.0 | 12.9     | 63.9 | 72.1             | 384     | 4.2      | 4.8   | 798   | 3259   | 10800.0 |
| n30H | 30  | 5     | 4569.0  | 2    | 108.6 | 6.4      | 94.0 | 96.5             | 214     | 2.4      | 2.7   | 254   | 173    | 988.5   |
| n30I | 30  | 5     | 4847.0  | 2    | 126.1 | 5.3      | 89.1 | 92.2             | 163     | 1.8      | 2.0   | 970   | 3743   | 10800.0 |
| n30J | 30  | 5     | 5041.0  | 2    | 115.4 | 10.9     | 92.2 | 98.9             | 141     | 3.8      | 4.1   | 146   | 41     | 159.9   |
| n40A | 40  | 8     | 8620.0  | 5    | 100.0 | 26.9     | 65.5 | 66.8             | 311     | 6.9      | 7.6   | 1058  | 6943   | 10800.0 |
| n40B | 40  | 8     | 8349.0  | 5    | 130.1 | 33.7     | 65.8 | 68.9             | 248     | 7.4      | 7.7   | 976   | 5967   | 10800.0 |
| n40C | 40  | 8     | 5812.0  | 3    | 124.0 | 27.9     | 91.1 | 96.8             | 431     | 9.4      | 10.4  | 633   | 5581   | 10800.0 |
| n40D | 40  | 8     | 7757.0  | 5    | 122.5 | 36.7     | 75.1 | 81.8             | 325     | 7.8      | 8.4   | 600   | 5337   | 10800.0 |
| n40E | 40  | 8     | 8995.0  | 4    | 100.0 | 24.1     | 57.8 | 63.2             | 231     | 5.5      | 5.8   | 444   | 7159   | 10800.0 |
| n40F | 40  | 8     | 5914.0  | 3    | 127.5 | 28.1     | 92.2 | 97.0             | 273     | 6.2      | 6.5   | 448   | 1387   | 2652.4  |
| n40G | 40  | 8     | 9918.0  | 5    | 100.0 | 55.7     | 59.0 | 62.6             | 528     | 7.8      | 8.3   | 739   | 4379   | 10800.0 |
| n40H | 40  | 8     | 8879.0  | 5    | 100.0 | 40.0     | 61.4 | 63.3             | 309     | 8.7      | 9.3   | 753   | 5883   | 10800.0 |
| n40I | 40  | 8     | 11188.0 | 5    | 100.0 | 34.4     | 47.8 | 50.6             | 464     | 6.3      | 7.0   | 811   | 8427   | 10800.0 |
| n40J | 40  | 8     | 7330.0  | 4    | 100.0 | 37.8     | 30.7 | 74.3             | 194     | 12.1     | 13.1  | 237   | 1543   | 10800.0 |

**Table EC.6** Detailed results on set  $S_B$  with  $Q = 10$  and  $T = 3600$ 

| Name | $n$ | $ K $ | $z^*$   | $rt$ | %UB   | $t_{UB}$ | %LB  | %LB $_r$ | $cut_r$ | $t_{PA}$ | $t_r$ | $cut$ | node  | $t$     |
|------|-----|-------|---------|------|-------|----------|------|----------|---------|----------|-------|-------|-------|---------|
| n10a | 10  | 5     | 3670.0  | 1    | 102.3 | 0.5      | 88.7 | 97.0     | 46      | 0.2      | 0.4   | 46    | 3     | 1.1     |
| n10A | 10  | 5     | 3055.0  | 2    | 100.0 | 0.6      | 97.1 | 100.0    | 36      | 0.2      | 0.4   | 36    | 1     | 1.1     |
| n10b | 10  | 5     | 3538.0  | 2    | 111.0 | 0.9      | 91.1 | 97.4     | 26      | 0.3      | 0.5   | 27    | 29    | 3.5     |
| n10B | 10  | 5     | 4256.0  | 2    | 110.9 | 0.4      | 89.2 | 91.4     | 56      | 0.1      | 0.3   | 110   | 2161  | 92.7    |
| n10c | 10  | 5     | 4408.0  | 2    | 100.0 | 0.3      | 98.7 | 100.0    | 8       | 0.1      | 0.3   | 8     | 1     | 0.7     |
| n10C | 10  | 5     | 3492.0  | 2    | 100.0 | 0.5      | 91.0 | 99.1     | 30      | 0.2      | 0.4   | 39    | 3     | 0.8     |
| n10d | 10  | 5     | 4593.0  | 2    | 100.0 | 0.6      | 88.5 | 97.8     | 27      | 0.2      | 0.4   | 28    | 35    | 3.1     |
| n10D | 10  | 5     | 3273.0  | 2    | 147.3 | 0.8      | 82.0 | 97.3     | 68      | 0.2      | 0.4   | 76    | 13    | 1.3     |
| n10e | 10  | 5     | 4055.0  | 2    | 101.5 | 0.4      | 93.8 | 97.7     | 41      | 0.1      | 0.3   | 46    | 29    | 1.3     |
| n10E | 10  | 5     | 4876.0  | 2    | 100.0 | 0.4      | 96.3 | 100.0    | 81      | 0.2      | 0.5   | 81    | 1     | 0.9     |
| n10f | 10  | 5     | 3468.0  | 2    | 106.9 | 0.6      | 85.9 | 90.7     | 38      | 0.2      | 0.4   | 40    | 239   | 10.7    |
| n10F | 10  | 5     | 4320.0  | 2    | 114.7 | 0.7      | 89.7 | 96.0     | 60      | 0.2      | 0.4   | 67    | 83    | 3.2     |
| n10g | 10  | 5     | 4431.0  | 2    | 106.7 | 0.5      | 87.1 | 89.1     | 14      | 0.1      | 0.3   | 35    | 423   | 14.1    |
| n10G | 10  | 5     | 4790.0  | 2    | 104.3 | 0.4      | 89.5 | 92.0     | 27      | 0.2      | 0.3   | 38    | 185   | 5.2     |
| n10h | 10  | 5     | 4194.0  | 2    | 100.0 | 0.5      | 97.1 | 98.7     | 40      | 0.1      | 0.3   | 41    | 3     | 2.9     |
| n10H | 10  | 5     | 4037.0  | 2    | 120.5 | 0.9      | 81.4 | 93.7     | 63      | 0.3      | 0.5   | 73    | 167   | 15.1    |
| n10i | 10  | 5     | 2677.0  | 2    | 100.0 | 0.4      | 99.9 | 100.0    | 15      | 0.1      | 0.3   | 15    | 1     | 0.7     |
| n10I | 10  | 5     | 3783.0  | 1    | 163.5 | 0.7      | 90.1 | 93.1     | 24      | 0.3      | 0.5   | 24    | 3     | 1.3     |
| n10j | 10  | 5     | 3580.0  | 2    | 100.0 | 0.5      | 97.3 | 99.2     | 54      | 0.2      | 0.4   | 54    | 3     | 1.5     |
| n10J | 10  | 5     | 3604.0  | 3    | 100.0 | 0.7      | 82.8 | 93.8     | 51      | 0.2      | 0.4   | 62    | 113   | 4.3     |
| n20A | 20  | 5     | 5200.0  | 3    | 100.0 | 2.0      | 96.9 | 99.5     | 97      | 0.8      | 1.1   | 97    | 5     | 7.1     |
| n20B | 20  | 5     | 5552.0  | 3    | 117.5 | 3.5      | 88.0 | 94.8     | 100     | 1.2      | 1.6   | 233   | 1723  | 325.4   |
| n20C | 20  | 5     | 6740.0  | 3    | 122.7 | 5.5      | 93.4 | 97.2     | 352     | 1.7      | 2.1   | 476   | 1339  | 332.8   |
| n20D | 20  | 5     | 6745.0  | 3    | 100.8 | 2.3      | 95.8 | 97.2     | 186     | 0.7      | 1.2   | 296   | 465   | 82.1    |
| n20E | 20  | 5     | 6691.0  | 3    | 108.1 | 3.7      | 90.9 | 98.4     | 299     | 1.4      | 2.0   | 366   | 627   | 151.6   |
| n20F | 20  | 5     | 5930.0  | 4    | 103.1 | 3.9      | 92.9 | 94.4     | 102     | 1.7      | 1.7   | 158   | 373   | 71.6    |
| n20G | 20  | 5     | 6070.0  | 3    | 108.5 | 3.5      | 90.2 | 96.7     | 117     | 1.3      | 1.6   | 188   | 729   | 130.6   |
| n20H | 20  | 5     | 6886.0  | 3    | 134.6 | 7.7      | 89.3 | 91.3     | 240     | 2.2      | 1.4   | 522   | 3671  | 919.9   |
| n20I | 20  | 5     | 5724.0  | 3    | 113.6 | 3.9      | 88.9 | 94.0     | 202     | 1.2      | 1.3   | 413   | 3545  | 1512.3  |
| n20J | 20  | 5     | 5290.0  | 3    | 151.6 | 3.3      | 87.8 | 91.2     | 340     | 0.7      | 0.9   | 471   | 3223  | 467.0   |
| n30A | 30  | 5     | 7491.0  | 4    | 119.1 | 40.5     | 95.7 | 97.9     | 344     | 27.1     | 8.5   | 514   | 2437  | 1951.7  |
| n30B | 30  | 5     | 7446.0  | 4    | 136.8 | 18.1     | 89.4 | 96.3     | 575     | 8.0      | 4.6   | 821   | 1289  | 704.0   |
| n30C | 30  | 5     | 9096.0  | 5    | 100.0 | 33.9     | 77.2 | 81.3     | 431     | 18.0     | 6.9   | 1492  | 13481 | 10800.0 |
| n30D | 30  | 5     | 9114.0  | 5    | 100.0 | 29.1     | 74.3 | 77.3     | 654     | 15.5     | 6.9   | 1160  | 15117 | 10800.0 |
| n30E | 30  | 5     | 7454.0  | 4    | 101.6 | 12.7     | 88.2 | 94.1     | 240     | 6.4      | 4.7   | 531   | 14787 | 10730.9 |
| n30F | 30  | 5     | 8541.0  | 5    | 100.0 | 73.6     | 80.5 | 84.5     | 366     | 53.7     | 6.8   | 1308  | 11799 | 10800.0 |
| n30G | 30  | 5     | 10209.0 | 5    | 100.0 | 29.2     | 88.8 | 93.4     | 961     | 13.8     | 6.0   | 2029  | 11503 | 10800.0 |
| n30H | 30  | 5     | 8277.0  | 4    | 100.0 | 26.1     | 82.1 | 84.9     | 408     | 12.8     | 7.0   | 718   | 12059 | 10800.0 |
| n30I | 30  | 6     | 8587.0  | 6    | 100.0 | 10.3     | 75.5 | 76.9     | 197     | 4.6      | 3.8   | 665   | 17733 | 10800.0 |
| n30J | 30  | 5     | 9116.0  | 5    | 100.0 | 52.7     | 71.7 | 74.4     | 507     | 24.8     | 5.2   | 1339  | 15049 | 10800.0 |
| n40A | 40  | 8     | 11640.0 | 8    | 100.0 | 59.7     | 70.2 | 74.1     | 764     | 24.6     | 10.3  | 1402  | 11369 | 10800.0 |
| n40B | 40  | 8     | 10456.0 | 6    | 100.0 | 66.1     | 70.1 | 73.1     | 587     | 20.3     | 12.3  | 1452  | 7783  | 10800.0 |
| n40C | 40  | 8     | 8588.0  | 5    | 123.6 | 32.6     | 94.6 | 98.2     | 520     | 12.1     | 8.1   | 825   | 11301 | 10800.0 |
| n40D | 40  | 8     | 10174.0 | 5    | 100.0 | 43.7     | 83.1 | 87.9     | 581     | 12.8     | 12.0  | 984   | 5615  | 10800.0 |
| n40E | 40  | 8     | 12328.0 | 8    | 100.0 | 41.0     | 59.4 | 63.6     | 783     | 8.7      | 7.5   | 1585  | 8969  | 10800.0 |
| n40F | 40  | 8     | 10972.0 | 7    | 100.0 | 47.9     | 76.9 | 80.9     | 623     | 19.0     | 11.3  | 1529  | 7269  | 10800.0 |
| n40G | 40  | 8     | 12933.0 | 7    | 100.0 | 87.1     | 67.3 | 69.3     | 705     | 26.0     | 14.3  | 1203  | 6721  | 10800.0 |
| n40H | 40  | 8     | 11816.0 | 7    | 100.0 | 110.4    | 69.1 | 70.6     | 708     | 48.8     | 12.7  | 1282  | 9221  | 10800.0 |
| n40I | 40  | 8     | 11072.0 | 7    | 100.0 | 75.0     | 78.3 | 83.1     | 569     | 30.7     | 7.8   | 1413  | 11667 | 10800.0 |
| n40J | 40  | 8     | 10418.0 | 6    | 100.0 | 24.7     | 70.6 | 73.9     | 424     | 8.0      | 6.9   | 1053  | 9539  | 10800.0 |

Table EC.7 Detailed results on set  $S_B$  with  $Q = 10$  and  $T = 7200$ 

| Name | $n$ | $ K $ | $z^*$   | $rt$ | %UB   | $t_{UB}$ | %LB  | %LB $_r$ | $cut_r$ | $t_{PA}$ | $t_r$ | $cut$ | $node$ | $t$     |
|------|-----|-------|---------|------|-------|----------|------|----------|---------|----------|-------|-------|--------|---------|
| n10a | 10  | 5     | 3484.0  | 1    | 110.2 | 0.3      | 90.0 | 100.0    | 58      | 0.7      | 1.0   | 58    | 3      | 1.4     |
| n10A | 10  | 5     | 2994.0  | 1    | 100.0 | 0.4      | 96.2 | 100.0    | 28      | 0.3      | 0.6   | 28    | 1      | 1.4     |
| n10b | 10  | 5     | 3122.0  | 1    | 100.0 | 0.4      | 86.4 | 100.0    | 24      | 0.7      | 1.0   | 24    | 1      | 1.4     |
| n10B | 10  | 5     | 3671.0  | 1    | 100.0 | 1.1      | 96.2 | 100.0    | 63      | 0.5      | 0.8   | 63    | 1      | 2.1     |
| n10c | 10  | 5     | 4226.0  | 1    | 100.0 | 0.6      | 98.0 | 100.0    | 16      | 0.2      | 0.5   | 16    | 1      | 1.2     |
| n10C | 10  | 5     | 3380.0  | 1    | 122.5 | 1.6      | 83.9 | 97.8     | 122     | 0.8      | 1.2   | 133   | 29     | 16.8    |
| n10d | 10  | 5     | 4238.0  | 1    | 100.0 | 0.9      | 89.0 | 100.0    | 24      | 0.4      | 0.7   | 24    | 1      | 1.8     |
| n10D | 10  | 5     | 3071.0  | 1    | 100.0 | 1.0      | 79.3 | 100.0    | 80      | 0.9      | 1.3   | 80    | 1      | 2.5     |
| n10e | 10  | 5     | 3816.0  | 1    | 100.0 | 0.1      | 88.8 | 100.0    | 60      | 0.4      | 0.7   | 60    | 1      | 0.8     |
| n10E | 10  | 5     | 4828.0  | 1    | 100.0 | 0.7      | 90.7 | 99.9     | 88      | 0.6      | 1.0   | 88    | 3      | 1.6     |
| n10f | 10  | 5     | 2996.0  | 1    | 166.3 | 2.1      | 83.9 | 98.0     | 65      | 0.9      | 1.2   | 66    | 13     | 20.7    |
| n10F | 10  | 5     | 3758.0  | 1    | 100.0 | 0.9      | 95.1 | 100.0    | 44      | 0.4      | 0.7   | 44    | 1      | 1.7     |
| n10g | 10  | 5     | 3685.0  | 1    | 113.4 | 1.3      | 87.1 | 94.2     | 54      | 0.5      | 0.8   | 58    | 61     | 5.0     |
| n10G | 10  | 5     | 3325.0  | 1    | 100.0 | 0.7      | 96.0 | 100.0    | 12      | 0.3      | 0.5   | 12    | 1      | 1.3     |
| n10h | 10  | 5     | 3960.0  | 1    | 117.8 | 0.5      | 91.7 | 99.9     | 48      | 0.4      | 0.7   | 48    | 3      | 1.5     |
| n10H | 10  | 5     | 3813.0  | 1    | 100.8 | 2.0      | 79.8 | 95.1     | 48      | 1.5      | 2.0   | 69    | 235    | 27.2    |
| n10i | 10  | 5     | 2390.0  | 1    | 100.0 | 0.9      | 96.5 | 100.0    | 25      | 0.4      | 0.7   | 25    | 1      | 1.9     |
| n10I | 10  | 5     | 3287.0  | 1    | 250.7 | 1.6      | 90.7 | 97.4     | 30      | 0.8      | 1.1   | 31    | 5      | 3.0     |
| n10j | 10  | 5     | 3249.0  | 1    | 119.9 | 1.0      | 98.0 | 99.1     | 20      | 0.5      | 0.7   | 20    | 9      | 1.9     |
| n10J | 10  | 5     | 3060.0  | 1    | 100.0 | 0.6      | 71.6 | 100.0    | 31      | 0.2      | 0.5   | 31    | 1      | 1.4     |
| n20A | 20  | 5     | 4815.0  | 2    | 111.4 | 7.6      | 90.1 | 97.6     | 240     | 2.0      | 2.9   | 278   | 339    | 113.0   |
| n20B | 20  | 5     | 4992.0  | 2    | 111.2 | 9.8      | 83.1 | 96.5     | 188     | 4.7      | 5.7   | 194   | 85     | 41.1    |
| n20C | 20  | 5     | 6089.0  | 2    | 100.4 | 5.3      | 93.8 | 99.5     | 699     | 12.0     | 14.3  | 702   | 5      | 21.5    |
| n20D | 20  | 5     | 6149.0  | 2    | 105.2 | 10.0     | 94.1 | 99.2     | 316     | 3.9      | 5.1   | 321   | 23     | 31.2    |
| n20E | 20  | 5     | 6343.0  | 2    | 104.1 | 37.9     | 88.8 | 99.1     | 683     | 11.1     | 13.2  | 692   | 75     | 196.6   |
| n20F | 20  | 5     | 4973.0  | 2    | 126.7 | 9.4      | 93.7 | 97.1     | 407     | 2.5      | 3.6   | 421   | 141    | 78.0    |
| n20G | 20  | 5     | 5364.0  | 2    | 139.9 | 18.6     | 87.1 | 97.6     | 303     | 5.4      | 6.4   | 311   | 17     | 110.7   |
| n20H | 20  | 5     | 5847.0  | 2    | 117.2 | 19.4     | 87.1 | 95.5     | 426     | 4.9      | 6.1   | 533   | 933    | 924.3   |
| n20I | 20  | 5     | 4818.0  | 2    | 116.1 | 15.4     | 86.6 | 97.2     | 386     | 4.4      | 5.6   | 442   | 283    | 375.7   |
| n20J | 20  | 5     | 4402.0  | 2    | 134.6 | 3.7      | 91.5 | 96.6     | 140     | 1.3      | 2.0   | 203   | 49     | 121.0   |
| n30A | 30  | 5     | 8069.0  | 4    | 100.0 | 91.1     | 73.7 | 79.0     | 1559    | 29.7     | 33.1  | 1751  | 2157   | 10800.0 |
| n30B | 30  | 5     | 7645.0  | 4    | 100.0 | 83.8     | 78.0 | 84.1     | 1384    | 28.6     | 33.7  | 1419  | 519    | 10800.0 |
| n30C | 30  | 5     | 8326.0  | 4    | 100.0 | 122.8    | 70.2 | 77.1     | 867     | 21.3     | 24.3  | 1122  | 1127   | 10800.0 |
| n30D | 30  | 5     | 7654.0  | 3    | 100.0 | 108.0    | 71.5 | 79.9     | 973     | 22.3     | 25.4  | 1346  | 841    | 10800.0 |
| n30E | 30  | 5     | 7216.0  | 3    | 100.0 | 53.5     | 73.3 | 82.5     | 534     | 19.2     | 21.8  | 726   | 1353   | 10800.0 |
| n30F | 30  | 5     | 6310.0  | 3    | 117.1 | 29.6     | 88.4 | 95.5     | 398     | 11.6     | 13.1  | 692   | 4099   | 10800.0 |
| n30G | 30  | 5     | 9037.0  | 2    | 116.4 | 111.6    | 90.4 | 98.5     | 1318    | 41.4     | 47.1  | 1764  | 357    | 10800.0 |
| n30H | 30  | 5     | 6194.0  | 2    | 119.5 | 76.4     | 91.3 | 96.6     | 531     | 28.5     | 30.3  | 669   | 359    | 10800.0 |
| n30I | 30  | 5     | 5975.0  | 3    | 100.0 | 43.6     | 82.4 | 90.0     | 551     | 10.6     | 12.7  | 1022  | 3143   | 10800.0 |
| n30J | 30  | 5     | 5984.0  | 2    | 103.1 | 63.4     | 92.5 | 98.6     | 502     | 17.7     | 19.9  | 549   | 133    | 3383.8  |
| n40A | 40  | 8     | 9413.0  | 5    | 100.0 | 134.0    | 72.4 | 76.6     | 1192    | 29.7     | 34.2  | 1375  | 441    | 10800.0 |
| n40B | 40  | 8     | 7295.0  | 3    | 100.0 | 147.7    | 79.3 | 85.5     | 664     | 43.7     | 47.3  | 940   | 1629   | 10800.0 |
| n40C | 40  | 8     | 7901.0  | 4    | 100.0 | 138.5    | 87.0 | 93.5     | 1149    | 59.8     | 65.2  | 1559  | 1265   | 10800.0 |
| n40D | 40  | 9     | 10391.0 | 4    | 100.0 | 358.0    | 70.2 | 77.2     | 1093    | 117.1    | 125.7 | 1159  | 551    | 10800.0 |
| n40E | 40  | 8     | 9677.0  | 5    | 100.0 | 193.7    | 59.5 | 68.0     | 990     | 42.5     | 46.4  | 1361  | 1591   | 10800.0 |
| n40F | 40  | 8     | 9218.0  | 4    | 100.0 | 148.7    | 73.3 | 80.0     | 1101    | 47.7     | 51.4  | 1356  | 707    | 10800.0 |
| n40G | 40  | 8     | 8415.0  | 4    | 100.0 | 198.8    | 86.2 | 90.3     | 876     | 55.4     | 57.6  | 1031  | 817    | 10800.0 |
| n40H | 40  | 8     | 9239.0  | 5    | 100.0 | 124.6    | 71.0 | 73.9     | 1249    | 26.5     | 29.8  | 1436  | 1539   | 10800.0 |
| n40I | 40  | 8     | 9089.0  | 4    | 100.0 | 100.9    | 74.2 | 81.3     | 699     | 32.5     | 34.8  | 1212  | 761    | 10800.0 |
| n40J | 40  | 8     | 10075.0 | 5    | 100.0 | 202.2    | 57.8 | 64.3     | 866     | 55.8     | 58.6  | 1254  | 1963   | 10800.0 |

ec20

e-companion to **Author:** *A New Exact Algorithm for the SPDVRP***Table EC.8** Detailed results on set  $S_C$  with  $|K| = 8$  and  $T = 10$ 

| Name             | $n$ | $Q$ | $z^*$    | $rt$ | %UB   | $t_{UB}$ | %LB   | %LB <sub>r</sub> | cut <sub>r</sub> | $t_{PA}$ | $t_r$ | cut  | node  | $t$     |
|------------------|-----|-----|----------|------|-------|----------|-------|------------------|------------------|----------|-------|------|-------|---------|
| 1Bari30          | 13  | 30  | 13000.0  | 2    | 100.0 | 1.4      | 92.5  | 95.8             | 22               | 0.6      | 0.8   | 27   | 55    | 16.3    |
| 2Bari20          | 13  | 20  | 13000.0  | 2    | 100.0 | 1.6      | 92.5  | 98.4             | 28               | 0.8      | 1.0   | 28   | 9     | 4.3     |
| 3Bari10          | 13  | 10  | 14200.0  | 2    | 100.0 | 1.0      | 95.4  | 100.0            | 52               | 0.3      | 0.6   | 52   | 1     | 2.2     |
| 4ReggioEmilia30  | 14  | 30  | 15800.0  | 2    | 107.0 | 1.2      | 91.7  | 92.2             | 21               | 0.6      | 0.8   | 24   | 93    | 13.0    |
| 5ReggioEmilia20  | 14  | 20  | 15800.0  | 2    | 100.0 | 1.3      | 95.3  | 99.9             | 61               | 0.5      | 0.8   | 61   | 1     | 2.2     |
| 6ReggioEmilia10  | 14  | 10  | 20600.0  | 2    | 104.9 | 1.5      | 93.8  | 99.0             | 185              | 0.4      | 0.8   | 190  | 27    | 2.6     |
| 7Bergamo30       | 15  | 30  | 11300.0  | 3    | 100.0 | 1.5      | 95.4  | 100.0            | 32               | 0.6      | 0.8   | 32   | 1     | 2.6     |
| 8Bergamo20       | 15  | 20  | 11300.0  | 3    | 100.0 | 0.8      | 97.8  | 100.0            | 44               | 0.3      | 0.4   | 44   | 1     | 1.6     |
| 9Bergamo12       | 15  | 12  | 11600.0  | 3    | 100.0 | 0.7      | 98.6  | 100.0            | 15               | 0.1      | 0.3   | 15   | 1     | 1.1     |
| 10Parma30        | 15  | 30  | 24100.0  | 2    | 100.0 | 1.3      | 98.6  | 100.0            | 6                | 0.6      | 0.9   | 6    | 1     | 2.3     |
| 11Parma20        | 15  | 20  | 24100.0  | 2    | 100.0 | 1.1      | 98.7  | 100.0            | 4                | 0.6      | 0.8   | 4    | 1     | 2.2     |
| 12Parma10        | 15  | 10  | 24100.0  | 2    | 100.0 | 0.9      | 100.0 | 100.0            | 0                | 0.3      | 0.6   | 0    | 1     | 1.5     |
| 13Treviso30      | 18  | 30  | 24138.0  | 3    | 107.9 | 1.7      | 91.5  | 96.9             | 22               | 0.7      | 0.8   | 33   | 99    | 13.8    |
| 14Treviso20      | 18  | 20  | 24138.0  | 3    | 107.9 | 2.4      | 91.5  | 96.9             | 21               | 0.9      | 1.2   | 32   | 93    | 16.8    |
| 15Treviso10      | 18  | 10  | 24138.0  | 3    | 117.8 | 1.6      | 92.4  | 96.9             | 19               | 0.6      | 0.8   | 37   | 105   | 9.5     |
| 16LaSpezia30     | 20  | 30  | 19298.0  | 3    | 107.5 | 2.8      | 92.1  | 93.5             | 40               | 1.0      | 1.1   | 205  | 5441  | 2148.3  |
| 17LaSpezia20     | 20  | 20  | 19298.0  | 3    | 107.5 | 2.5      | 92.1  | 93.5             | 40               | 0.8      | 1.0   | 201  | 5371  | 1970.6  |
| 18LaSpezia10     | 20  | 10  | 19409.0  | 3    | 114.3 | 2.5      | 93.1  | 94.5             | 55               | 0.8      | 1.1   | 191  | 3487  | 539.7   |
| 19BuenosAires30  | 21  | 30  | 57020.0  | 3    | 103.5 | 3.9      | 95.9  | 98.3             | 302              | 0.8      | 1.2   | 517  | 1001  | 227.6   |
| 20BuenosAires20  | 21  | 20  | 64641.0  | 3    | 103.0 | 3.2      | 97.5  | 99.1             | 996              | 0.5      | 1.0   | 2570 | 585   | 332.2   |
| 21Ottawa30       | 21  | 30  | 17475.0  | 3    | 106.5 | 2.7      | 97.5  | 97.5             | 22               | 1.2      | 1.3   | 22   | 13    | 5.7     |
| 22Ottawa20       | 21  | 20  | 17475.0  | 3    | 106.5 | 2.4      | 97.5  | 97.5             | 22               | 0.9      | 1.1   | 22   | 13    | 5.4     |
| 23Ottawa10       | 21  | 10  | 17475.0  | 3    | 102.8 | 1.8      | 97.5  | 97.6             | 29               | 0.6      | 0.8   | 29   | 13    | 3.1     |
| 24SanAntonio30   | 23  | 30  | 19821.0  | 3    | 100.0 | 3.0      | 93.3  | 95.8             | 82               | 1.0      | 1.1   | 103  | 369   | 231.7   |
| 25SanAntonio20   | 23  | 20  | 19877.0  | 3    | 105.8 | 1.9      | 95.5  | 97.4             | 98               | 0.6      | 0.6   | 123  | 97    | 30.1    |
| 26SanAntonio10   | 23  | 10  | 24743.0  | 4    | 100.7 | 2.3      | 94.5  | 97.5             | 371              | 0.4      | 0.5   | 462  | 1299  | 449.7   |
| 27Brescia30      | 27  | 30  | 24300.0  | 4    | 105.3 | 3.3      | 93.0  | 96.9             | 84               | 0.8      | 0.8   | 551  | 7989  | 3210.2  |
| 28Brescia20      | 27  | 20  | 24600.0  | 4    | 106.1 | 3.1      | 92.7  | 96.1             | 82               | 0.6      | 0.7   | 931  | 15875 | 10800.0 |
| 29Brescia11      | 27  | 11  | 25700.0  | 4    | 102.3 | 2.5      | 94.5  | 98.1             | 214              | 0.4      | 0.5   | 510  | 9283  | 5546.7  |
| 30Roma30         | 28  | 30  | 52400.0  | 4    | 144.8 | 3.4      | 83.2  | 99.2             | 279              | 0.7      | 0.8   | 314  | 297   | 366.5   |
| 31Roma20         | 28  | 20  | 54200.0  | 4    | 100.0 | 5.0      | 86.3  | 100.0            | 477              | 1.2      | 1.7   | 477  | 1     | 7.1     |
| 32Roma18         | 28  | 18  | 55100.0  | 4    | 101.5 | 3.1      | 88.6  | 99.1             | 487              | 0.5      | 0.7   | 1335 | 2201  | 1574.0  |
| 33Madison30      | 28  | 30  | 36204.0  | 4    | 105.1 | 9.6      | 94.0  | 96.4             | 44               | 2.7      | 2.7   | 259  | 3749  | 3750.6  |
| 34Madison20      | 28  | 20  | 36204.0  | 4    | 105.1 | 13.1     | 94.0  | 96.4             | 44               | 4.3      | 4.7   | 171  | 2289  | 2202.6  |
| 35Madison10      | 28  | 10  | 38358.0  | 4    | 115.8 | 4.1      | 92.8  | 96.9             | 84               | 0.9      | 1.0   | 298  | 2189  | 942.6   |
| 36Guadalajara30  | 41  | 30  | 52083.0  | 8    | 100.0 | 59.3     | 82.3  | 86.9             | 53               | 48.0     | 20.1  | 472  | 2669  | 10800.0 |
| 37Guadalajara20  | 41  | 20  | 49196.0  | 7    | 100.0 | 16.0     | 87.2  | 92.0             | 80               | 6.0      | 3.9   | 191  | 615   | 10800.0 |
| 38Guadalajara11  | 41  | 11  | 50075.0  | 6    | 100.0 | 19.7     | 87.8  | 92.1             | 352              | 8.3      | 7.5   | 477  | 573   | 10800.0 |
| 39Dublin30       | 45  | 30  | 37357.0  | 6    | 100.0 | 45.1     | 84.2  | 85.9             | 210              | 21.4     | 12.4  | 1032 | 7789  | 10800.0 |
| 40Dublin20       | 45  | 20  | 36806.0  | 6    | 100.0 | 38.0     | 86.9  | 88.4             | 233              | 7.7      | 8.4   | 747  | 5989  | 10800.0 |
| 41Dublin11       | 45  | 11  | 41989.0  | 7    | 100.0 | 34.3     | 86.4  | 88.0             | 1890             | 6.3      | 8.4   | 2408 | 2367  | 10800.4 |
| 42Denver30       | 51  | 30  | 55212.0  | 7    | 100.0 | 320.7    | 84.9  | 89.5             | 412              | 160.2    | 42.2  | 536  | 1729  | 10800.0 |
| 43Denver20       | 51  | 20  | 52669.0  | 7    | 100.0 | 167.2    | 89.9  | 94.1             | 321              | 20.5     | 21.2  | 396  | 319   | 10800.0 |
| 44Denver10       | 51  | 10  | 57707.0  | 8    | 100.0 | 323.3    | 89.9  | 96.2             | 881              | 225.1    | 78.4  | 985  | 1323  | 10800.0 |
| 45RioDeJaneiro30 | 55  | 30  | 136797.0 | 7    | 100.0 | 1864.2   | 91.3  | 92.1             | 331              | 1641.7   | 508.8 | 718  | 3171  | 10800.0 |
| 46RioDeJaneiro20 | 55  | 20  | 145392.0 | 8    | 100.0 | 1594.6   | 87.2  | 88.0             | 1493             | 1312.4   | 290.2 | 1831 | 4349  | 10800.0 |
| 47RioDeJaneiro10 | 55  | 10  | 162198.0 | 8    | 100.0 | 690.4    | 94.3  | 97.0             | 9328             | 414.3    | 150.5 | 9546 | 227   | 10800.0 |

**Table EC.9** Detailed results on set  $S_C$  with  $|K| = 8$  and  $T = 15$ 

| Name             | $n$ | $Q$ | $z^*$    | $rt$ | %UB   | $t_{UB}$ | %LB   | %LB <sub>r</sub> | $cut_r$ | $t_{PA}$ | $t_r$ | $cut$ | $node$ | $t$     |
|------------------|-----|-----|----------|------|-------|----------|-------|------------------|---------|----------|-------|-------|--------|---------|
| 1Bari30          | 13  | 30  | 12000.0  | 1    | 100.0 | 2.2      | 94.7  | 100.0            | 12      | 1.3      | 1.4   | 12    | 1      | 3.7     |
| 2Bari20          | 13  | 20  | 12700.0  | 1    | 100.0 | 0.9      | 90.8  | 100.0            | 24      | 0.5      | 0.5   | 24    | 1      | 1.5     |
| 3Bari10          | 13  | 10  | 14200.0  | 2    | 100.0 | 0.6      | 95.1  | 100.0            | 57      | 0.1      | 0.1   | 57    | 1      | 1.1     |
| 4ReggioEmilia30  | 14  | 30  | 13100.0  | 1    | 100.0 | 0.9      | 100.0 | 100.0            | 5       | 0.4      | 0.4   | 5     | 1      | 1.4     |
| 5ReggioEmilia20  | 14  | 20  | 15800.0  | 2    | 131.6 | 0.6      | 91.6  | 99.6             | 81      | 0.2      | 0.2   | 81    | 9      | 2.5     |
| 6ReggioEmilia10  | 14  | 10  | 20300.0  | 2    | 100.0 | 0.8      | 94.9  | 100.0            | 135     | 0.3      | 0.4   | 135   | 1      | 1.3     |
| 7Bergamo30       | 15  | 30  | 11300.0  | 2    | 100.0 | 1.1      | 94.5  | 100.0            | 42      | 0.2      | 0.2   | 42    | 1      | 1.6     |
| 8Bergamo20       | 15  | 20  | 11300.0  | 3    | 100.0 | 0.4      | 97.3  | 100.0            | 38      | 0.1      | 0.1   | 38    | 1      | 0.9     |
| 9Bergamo12       | 15  | 12  | 11600.0  | 3    | 100.0 | 0.3      | 98.6  | 100.0            | 21      | 0.0      | 0.1   | 21    | 1      | 0.7     |
| 10Parma30        | 15  | 30  | 24100.0  | 2    | 100.0 | 1.0      | 97.2  | 100.0            | 16      | 0.3      | 0.3   | 16    | 1      | 1.4     |
| 11Parma20        | 15  | 20  | 24100.0  | 2    | 100.0 | 0.7      | 97.7  | 100.0            | 16      | 0.2      | 0.2   | 16    | 1      | 0.9     |
| 12Parma10        | 15  | 10  | 24100.0  | 2    | 100.0 | 0.2      | 100.0 | 100.0            | 1       | 0.0      | 0.1   | 1     | 1      | 0.3     |
| 13Treviso30      | 18  | 30  | 22837.0  | 2    | 100.0 | 4.5      | 91.2  | 100.0            | 31      | 1.4      | 1.5   | 31    | 1      | 1.5     |
| 14Treviso20      | 18  | 20  | 22837.0  | 2    | 100.0 | 2.6      | 91.2  | 100.0            | 27      | 1.1      | 1.2   | 27    | 1      | 3.8     |
| 15Treviso10      | 18  | 10  | 22837.0  | 2    | 100.0 | 0.8      | 93.1  | 100.0            | 24      | 0.3      | 0.4   | 24    | 1      | 1.3     |
| 16LaSpezia30     | 20  | 30  | 17882.0  | 2    | 107.1 | 7.8      | 91.1  | 93.7             | 38      | 3.9      | 4.1   | 622   | 10583  | 10800.0 |
| 17LaSpezia20     | 20  | 20  | 17874.0  | 2    | 107.1 | 4.3      | 91.2  | 93.7             | 42      | 1.7      | 1.8   | 644   | 11873  | 10800.0 |
| 18LaSpezia10     | 20  | 10  | 17863.0  | 2    | 116.9 | 2.2      | 94.3  | 96.6             | 58      | 0.9      | 1.0   | 100   | 809    | 443.3   |
| 19BuenosAires30  | 21  | 30  | 56898.0  | 3    | 105.4 | 2.9      | 95.2  | 98.0             | 309     | 0.6      | 0.7   | 937   | 3737   | 2720.6  |
| 20BuenosAires20  | 21  | 20  | 64087.0  | 3    | 100.0 | 1.9      | 98.2  | 99.9             | 577     | 0.5      | 0.8   | 598   | 5      | 4.1     |
| 21Ottawa30       | 21  | 30  | 16198.0  | 2    | 107.9 | 6.7      | 93.8  | 94.3             | 32      | 2.2      | 2.3   | 116   | 617    | 702.2   |
| 22Ottawa20       | 21  | 20  | 16198.0  | 2    | 109.3 | 5.0      | 93.8  | 94.3             | 32      | 1.7      | 1.7   | 105   | 487    | 491.2   |
| 23Ottawa10       | 21  | 10  | 16196.0  | 2    | 100.0 | 2.6      | 94.2  | 95.9             | 67      | 1.0      | 1.1   | 88    | 187    | 148.2   |
| 24SanAntonio30   | 23  | 30  | 17279.0  | 2    | 100.0 | 10.0     | 92.9  | 99.2             | 139     | 4.1      | 4.3   | 140   | 9      | 29.7    |
| 25SanAntonio20   | 23  | 20  | 17581.0  | 2    | 100.0 | 3.9      | 97.1  | 100.0            | 151     | 1.5      | 1.6   | 151   | 1      | 5.8     |
| 26SanAntonio10   | 23  | 10  | 23893.0  | 3    | 100.0 | 3.5      | 97.0  | 99.9             | 370     | 0.9      | 1.0   | 370   | 1      | 4.7     |
| 27Brescia30      | 27  | 30  | 22900.0  | 3    | 112.7 | 11.2     | 93.3  | 98.4             | 78      | 3.0      | 3.1   | 199   | 491    | 3061.8  |
| 28Brescia20      | 27  | 20  | 23300.0  | 3    | 105.2 | 9.0      | 93.2  | 97.6             | 104     | 3.3      | 3.8   | 343   | 6221   | 6753.2  |
| 29Brescia11      | 27  | 11  | 25100.0  | 3    | 102.0 | 5.1      | 93.8  | 99.0             | 293     | 0.9      | 1.1   | 471   | 2813   | 2535.5  |
| 30Roma30         | 28  | 30  | 51800.0  | 3    | 106.4 | 8.5      | 77.6  | 99.6             | 278     | 2.3      | 2.7   | 305   | 125    | 464.8   |
| 31Roma20         | 28  | 20  | 54200.0  | 4    | 100.0 | 5.3      | 84.4  | 100.0            | 371     | 1.1      | 1.4   | 371   | 1      | 7.1     |
| 32Roma18         | 28  | 18  | 54800.0  | 3    | 103.5 | 6.3      | 87.2  | 99.4             | 532     | 0.7      | 0.9   | 1627  | 4741   | 10800.0 |
| 33Madison30      | 28  | 30  | 32407.0  | 3    | 107.8 | 27.4     | 92.3  | 95.3             | 92      | 8.8      | 8.9   | 347   | 1967   | 10800.0 |
| 34Madison20      | 28  | 20  | 32407.0  | 3    | 107.6 | 15.8     | 92.3  | 95.4             | 91      | 5.2      | 5.3   | 339   | 2053   | 7695.5  |
| 35Madison10      | 28  | 10  | 34815.0  | 2    | 122.7 | 8.6      | 90.6  | 95.6             | 103     | 2.5      | 2.7   | 525   | 2197   | 3579.2  |
| 36Guadalajara30  | 41  | 30  | 43867.0  | 4    | 101.1 | 39.9     | 90.5  | 96.9             | 59      | 14.2     | 14.2  | 199   | 1563   | 10800.0 |
| 37Guadalajara20  | 41  | 20  | 43963.0  | 4    | 100.9 | 30.0     | 90.8  | 96.7             | 70      | 9.4      | 9.5   | 408   | 2987   | 10800.0 |
| 38Guadalajara11  | 41  | 11  | 44411.0  | 4    | 108.5 | 34.7     | 93.2  | 98.6             | 738     | 7.3      | 8.8   | 856   | 451    | 3364.2  |
| 39Dublin30       | 45  | 30  | 36032.0  | 5    | 100.0 | 74.2     | 75.6  | 77.5             | 259     | 10.7     | 10.9  | 687   | 3721   | 10800.0 |
| 40Dublin20       | 45  | 20  | 36841.0  | 5    | 100.0 | 46.0     | 77.2  | 79.4             | 661     | 7.9      | 8.7   | 994   | 4509   | 10800.0 |
| 41Dublin11       | 45  | 11  | 39408.0  | 5    | 100.0 | 63.5     | 87.8  | 90.6             | 2055    | 8.8      | 13.6  | 2960  | 1871   | 10800.0 |
| 42Denver30       | 51  | 30  | 50270.0  | 5    | 100.0 | 193.2    | 84.6  | 91.6             | 340     | 37.8     | 39.0  | 426   | 499    | 10800.0 |
| 43Denver20       | 51  | 20  | 48122.0  | 5    | 100.0 | 127.4    | 90.5  | 96.7             | 486     | 24.0     | 25.0  | 687   | 1553   | 10800.0 |
| 44Denver10       | 51  | 10  | 53320.0  | 7    | 100.0 | 61.4     | 90.9  | 99.8             | 2276    | 13.1     | 17.3  | 2714  | 541    | 10800.0 |
| 45RioDeJaneiro30 | 55  | 30  | 119839.0 | 5    | 100.0 | 608.8    | 85.6  | 87.6             | 618     | 88.7     | 90.6  | 751   | 1013   | 10800.0 |
| 46RioDeJaneiro20 | 55  | 20  | 124209.0 | 5    | 100.0 | 345.4    | 86.7  | 89.0             | 2256    | 61.3     | 66.8  | 2632  | 1483   | 10800.0 |
| 47RioDeJaneiro10 | 55  | 10  | 156826.0 | 6    | 100.0 | 1495.8   | 96.1  | 99.6             | 15515   | 191.8    | 313.7 | 15528 | 79     | 10800.0 |

Table EC.10 Detailed results of the pricing algorithms on set  $S_A$ 

| Name | $n$ | $ K $ | $LB$    | EXM pricing algorithm |          |       |         | Pricing algorithm based on Casazza et al. (2019) |        |          |          |        |          |        |         |
|------|-----|-------|---------|-----------------------|----------|-------|---------|--------------------------------------------------|--------|----------|----------|--------|----------|--------|---------|
|      |     |       |         | $t_{LP}$              | $t_{PA}$ | $fw$  | $fwd$   | $bw$                                             | $bwd$  | $t_{LP}$ | $t_{PA}$ | $fw$   | $fwd$    | $bw$   | $bwd$   |
| n10a | 10  | 5     | 3210.46 | 0.22                  | 0.12     | 1295  | 7699    | 1153                                             | 7182   | 0.25     | 0.12     | 10116  | 179826   | 3841   | 68628   |
| n10A | 10  | 5     | 2920.76 | 0.07                  | 0.06     | 1289  | 7886    | 800                                              | 4615   | 0.09     | 0.08     | 13319  | 248455   | 5481   | 106743  |
| n10b | 10  | 5     | 2687.58 | 0.06                  | 0.05     | 1611  | 10768   | 708                                              | 4274   | 0.06     | 0.05     | 7421   | 95630    | 4787   | 60123   |
| n10B | 10  | 5     | 3540.84 | 0.04                  | 0.03     | 1096  | 6971    | 862                                              | 5552   | 0.08     | 0.07     | 13907  | 295130   | 6385   | 130118  |
| n10c | 10  | 5     | 4183.67 | 0.04                  | 0.04     | 1153  | 7460    | 716                                              | 4586   | 0.06     | 0.05     | 9525   | 181410   | 3767   | 67273   |
| n10C | 10  | 5     | 2878.65 | 0.04                  | 0.04     | 1242  | 7641    | 895                                              | 5536   | 0.07     | 0.06     | 13383  | 276098   | 5247   | 103073  |
| n10d | 10  | 5     | 3897.11 | 0.04                  | 0.03     | 994   | 5904    | 837                                              | 5400   | 0.05     | 0.04     | 9599   | 165563   | 4193   | 67251   |
| n10D | 10  | 5     | 2609.49 | 0.03                  | 0.03     | 862   | 5677    | 533                                              | 3309   | 0.07     | 0.06     | 13227  | 252539   | 5442   | 99873   |
| n10e | 10  | 5     | 3403.77 | 0.04                  | 0.03     | 1300  | 7867    | 847                                              | 4962   | 0.07     | 0.06     | 13018  | 279380   | 5027   | 114377  |
| n10E | 10  | 5     | 4489.26 | 0.03                  | 0.02     | 1253  | 7763    | 829                                              | 5005   | 0.09     | 0.08     | 13725  | 266647   | 5237   | 108301  |
| n10f | 10  | 5     | 2656.90 | 0.04                  | 0.04     | 1380  | 8916    | 1154                                             | 7203   | 0.04     | 0.04     | 10434  | 147948   | 4935   | 63680   |
| n10F | 10  | 5     | 3662.62 | 0.05                  | 0.04     | 1055  | 6473    | 1046                                             | 6358   | 0.08     | 0.07     | 21457  | 418085   | 8588   | 157857  |
| n10g | 10  | 5     | 3417.47 | 0.04                  | 0.04     | 1336  | 8495    | 1026                                             | 6297   | 0.03     | 0.03     | 10652  | 148853   | 4986   | 66678   |
| n10G | 10  | 5     | 3435.92 | 0.05                  | 0.04     | 1588  | 10325   | 1082                                             | 6433   | 0.06     | 0.05     | 14029  | 255705   | 8463   | 145785  |
| n10h | 10  | 5     | 3683.04 | 0.02                  | 0.02     | 728   | 4769    | 571                                              | 3674   | 0.06     | 0.04     | 11629  | 256757   | 5990   | 129142  |
| n10H | 10  | 5     | 3196.66 | 0.04                  | 0.04     | 1797  | 12068   | 922                                              | 5400   | 0.06     | 0.05     | 12486  | 210277   | 6164   | 93828   |
| n10i | 10  | 5     | 2424.54 | 0.03                  | 0.03     | 1128  | 7155    | 843                                              | 5213   | 0.05     | 0.04     | 11756  | 248329   | 5727   | 114724  |
| n10I | 10  | 5     | 3325.31 | 0.04                  | 0.04     | 1423  | 8685    | 936                                              | 5687   | 0.06     | 0.05     | 15879  | 270575   | 8381   | 120506  |
| n10j | 10  | 5     | 3247.21 | 0.05                  | 0.03     | 1422  | 8486    | 1350                                             | 8644   | 0.04     | 0.03     | 11742  | 197631   | 5351   | 79767   |
| n10J | 10  | 5     | 2481.71 | 0.02                  | 0.02     | 1032  | 5650    | 715                                              | 3775   | 0.06     | 0.06     | 14687  | 276466   | 7171   | 132925  |
| n20A | 20  | 5     | 4536.44 | 0.08                  | 0.08     | 2517  | 30782   | 1929                                             | 22382  | 0.19     | 0.17     | 44854  | 1484500  | 13808  | 454721  |
| n20B | 20  | 5     | 4531.57 | 0.13                  | 0.10     | 3702  | 48873   | 2588                                             | 31230  | 0.19     | 0.17     | 35617  | 1029506  | 20913  | 595797  |
| n20C | 20  | 5     | 5984.86 | 0.14                  | 0.13     | 3813  | 56161   | 2887                                             | 41968  | 0.29     | 0.26     | 56568  | 2245901  | 17478  | 671402  |
| n20D | 20  | 5     | 6003.32 | 0.10                  | 0.09     | 2623  | 36310   | 2003                                             | 27690  | 0.23     | 0.21     | 54882  | 2262819  | 16502  | 637700  |
| n20E | 20  | 5     | 5753.30 | 0.08                  | 0.07     | 2668  | 33141   | 1886                                             | 23269  | 0.31     | 0.29     | 70617  | 2881158  | 17137  | 702416  |
| n20F | 20  | 5     | 4839.56 | 0.18                  | 0.17     | 4108  | 59754   | 3143                                             | 45840  | 0.27     | 0.25     | 47092  | 1588739  | 16122  | 531393  |
| n20G | 20  | 5     | 4982.84 | 0.11                  | 0.10     | 3753  | 51035   | 2844                                             | 37447  | 0.31     | 0.30     | 53745  | 1866876  | 20101  | 679978  |
| n20H | 20  | 5     | 5325.79 | 0.12                  | 0.11     | 3973  | 52095   | 2260                                             | 27363  | 0.23     | 0.21     | 43700  | 1563580  | 19655  | 666687  |
| n20I | 20  | 5     | 4440.42 | 0.11                  | 0.10     | 3398  | 45527   | 2909                                             | 37963  | 0.28     | 0.26     | 57772  | 2295937  | 22516  | 810477  |
| n20J | 20  | 5     | 4184.48 | 0.05                  | 0.05     | 2273  | 26140   | 1698                                             | 18294  | 0.16     | 0.15     | 39773  | 1245442  | 14243  | 418189  |
| n30A | 30  | 5     | 6349.58 | 1.71                  | 1.62     | 56385 | 1426499 | 6406                                             | 134728 | 3.53     | 3.13     | 674153 | 30257204 | 67189  | 3300935 |
| n30B | 30  | 5     | 6330.89 | 0.27                  | 0.22     | 7745  | 146530  | 4611                                             | 82087  | 0.89     | 0.80     | 130008 | 5974514  | 38371  | 1680991 |
| n30C | 30  | 5     | 6286.25 | 0.37                  | 0.35     | 10154 | 218637  | 6581                                             | 132497 | 1.56     | 1.49     | 240993 | 12669772 | 62448  | 3285250 |
| n30D | 30  | 5     | 6205.94 | 0.36                  | 0.33     | 10744 | 239889  | 5613                                             | 116114 | 1.29     | 1.23     | 173304 | 9847364  | 60720  | 2959403 |
| n30E | 30  | 5     | 5904.85 | 0.26                  | 0.24     | 8251  | 160423  | 6124                                             | 112176 | 1.10     | 1.06     | 163593 | 8165108  | 55175  | 2530636 |
| n30F | 30  | 5     | 5934.98 | 0.48                  | 0.45     | 14419 | 337181  | 6904                                             | 143155 | 1.33     | 1.26     | 194338 | 9641139  | 63077  | 2903879 |
| n30G | 30  | 5     | 8583.22 | 0.29                  | 0.27     | 9805  | 209045  | 5063                                             | 99174  | 1.57     | 1.47     | 229395 | 12397868 | 52668  | 2784856 |
| n30H | 30  | 5     | 6144.99 | 0.30                  | 0.28     | 10497 | 224716  | 6127                                             | 117241 | 1.14     | 1.09     | 169089 | 8154504  | 54269  | 2490230 |
| n30I | 30  | 5     | 5463.43 | 0.30                  | 0.27     | 10430 | 219272  | 6274                                             | 117921 | 1.11     | 1.06     | 176453 | 9357450  | 58018  | 2964312 |
| n30J | 30  | 5     | 6188.78 | 0.31                  | 0.29     | 10456 | 223443  | 6168                                             | 119002 | 0.82     | 0.77     | 148975 | 6980344  | 50911  | 2440887 |
| n40A | 40  | 8     | 7461.64 | 0.68                  | 0.65     | 17652 | 527935  | 12711                                            | 358630 | 3.80     | 3.49     | 366716 | 27379934 | 116736 | 7955340 |
| n40B | 40  | 8     | 6776.35 | 0.74                  | 0.71     | 20899 | 598727  | 14351                                            | 386624 | 2.76     | 2.63     | 279112 | 17943842 | 107500 | 6347114 |
| n40C | 40  | 8     | 7406.27 | 0.51                  | 0.48     | 14760 | 399686  | 9593                                             | 248351 | 2.35     | 2.23     | 264213 | 18144923 | 70780  | 4709741 |
| n40D | 40  | 8     | 7957.55 | 0.54                  | 0.51     | 14140 | 395622  | 10712                                            | 281881 | 2.11     | 1.97     | 237273 | 16154355 | 81492  | 5157916 |
| n40E | 40  | 8     | 6633.23 | 0.25                  | 0.24     | 8010  | 208214  | 5212                                             | 125564 | 1.62     | 1.54     | 207328 | 13982110 | 81558  | 4851519 |
| n40F | 40  | 8     | 7375.05 | 0.65                  | 0.62     | 16476 | 477856  | 12356                                            | 329648 | 2.30     | 2.19     | 272667 | 18757723 | 85861  | 5394279 |
| n40G | 40  | 8     | 8118.96 | 0.66                  | 0.64     | 17376 | 531241  | 12127                                            | 345382 | 2.23     | 2.13     | 257001 | 16443458 | 86367  | 5484495 |
| n40H | 40  | 8     | 7386.82 | 0.69                  | 0.66     | 18667 | 570597  | 11026                                            | 306135 | 2.35     | 2.23     | 268078 | 17299706 | 101216 | 6273152 |
| n40I | 40  | 8     | 7417.07 | 0.50                  | 0.47     | 12483 | 360401  | 8509                                             | 223161 | 2.17     | 2.08     | 281657 | 19028251 | 77194  | 4929908 |
| n40J | 40  | 8     | 6842.06 | 0.45                  | 0.43     | 13259 | 374194  | 8015                                             | 212394 | 1.94     | 1.85     | 261514 | 16575702 | 80910  | 5112481 |

Table EC.11 Detailed results of the pricing algorithms on set  $S_A-3$ 

| Name | $n$ | $ K $ | $LB$    | EXM pricing algorithm |          |       |         |       |        | Pricing algorithm based on Casazza et al. (2019) |          |         |           |         |           |
|------|-----|-------|---------|-----------------------|----------|-------|---------|-------|--------|--------------------------------------------------|----------|---------|-----------|---------|-----------|
|      |     |       |         | $t_{LP}$              | $t_{PA}$ | $fw$  | $fwd$   | $bw$  | $bwd$  | $t_{LP}$                                         | $t_{PA}$ | $fw$    | $fwd$     | $bw$    | $bwd$     |
| n10a | 10  | 5     | 3210.46 | 0.02                  | 0.02     | 1199  | 7386    | 990   | 6133   | 0.66                                             | 0.51     | 75532   | 4059582   | 24419   | 1256555   |
| n10A | 10  | 5     | 2920.76 | 0.02                  | 0.01     | 1060  | 6708    | 648   | 3856   | 0.43                                             | 0.41     | 81000   | 4058653   | 30545   | 1897964   |
| n10b | 10  | 5     | 2687.58 | 0.02                  | 0.02     | 1448  | 9340    | 733   | 4431   | 0.24                                             | 0.22     | 44033   | 1678240   | 26549   | 984305    |
| n10B | 10  | 5     | 3540.84 | 0.02                  | 0.01     | 970   | 6308    | 702   | 4417   | 0.48                                             | 0.47     | 95236   | 5825666   | 41190   | 2586838   |
| n10c | 10  | 5     | 4183.67 | 0.02                  | 0.01     | 967   | 6532    | 639   | 4027   | 0.47                                             | 0.45     | 93910   | 5146221   | 20951   | 1356481   |
| n10C | 10  | 5     | 2878.65 | 0.01                  | 0.01     | 905   | 5602    | 623   | 4032   | 0.53                                             | 0.51     | 90407   | 5247109   | 34566   | 1975468   |
| n10d | 10  | 5     | 3897.11 | 0.02                  | 0.01     | 1061  | 6439    | 920   | 6052   | 0.38                                             | 0.37     | 77417   | 3945299   | 13157   | 710748    |
| n10D | 10  | 5     | 2609.49 | 0.02                  | 0.01     | 1082  | 6863    | 745   | 4552   | 0.47                                             | 0.46     | 102084  | 5496797   | 31631   | 1716018   |
| n10e | 10  | 5     | 3403.77 | 0.02                  | 0.02     | 1211  | 7523    | 815   | 4822   | 0.45                                             | 0.44     | 79163   | 4648446   | 27979   | 1912797   |
| n10E | 10  | 5     | 4489.26 | 0.02                  | 0.01     | 1149  | 6955    | 736   | 4398   | 0.38                                             | 0.37     | 82734   | 4526282   | 25140   | 1465485   |
| n10f | 10  | 5     | 2656.90 | 0.03                  | 0.02     | 1632  | 10352   | 1429  | 8673   | 0.35                                             | 0.34     | 88298   | 3493301   | 28483   | 1038123   |
| n10F | 10  | 5     | 3662.62 | 0.02                  | 0.02     | 1151  | 7080    | 1185  | 7314   | 0.72                                             | 0.71     | 138380  | 8332747   | 46622   | 2396069   |
| n10g | 10  | 5     | 3417.47 | 0.02                  | 0.02     | 1301  | 8050    | 831   | 5246   | 0.26                                             | 0.23     | 72538   | 2929255   | 31682   | 1252324   |
| n10G | 10  | 5     | 3435.92 | 0.02                  | 0.02     | 1400  | 9066    | 981   | 5769   | 0.45                                             | 0.44     | 95400   | 4584860   | 48731   | 2340879   |
| n10h | 10  | 5     | 3683.04 | 0.01                  | 0.01     | 818   | 5200    | 626   | 4048   | 0.55                                             | 0.54     | 94824   | 6436342   | 43833   | 2825061   |
| n10H | 10  | 5     | 3196.66 | 0.02                  | 0.02     | 1881  | 12641   | 936   | 5511   | 0.33                                             | 0.32     | 87921   | 3880680   | 45893   | 2026163   |
| n10i | 10  | 5     | 2424.54 | 0.02                  | 0.01     | 1183  | 7595    | 864   | 5261   | 0.45                                             | 0.44     | 87300   | 5057647   | 39376   | 2090985   |
| n10I | 10  | 5     | 3325.31 | 0.02                  | 0.02     | 1603  | 10212   | 979   | 6196   | 0.52                                             | 0.51     | 123629  | 6148698   | 49886   | 1994902   |
| n10j | 10  | 5     | 3247.21 | 0.02                  | 0.02     | 1321  | 8176    | 1345  | 8720   | 0.26                                             | 0.25     | 73333   | 3599945   | 23962   | 1053735   |
| n10J | 10  | 5     | 2481.71 | 0.01                  | 0.01     | 796   | 4306    | 562   | 3021   | 0.44                                             | 0.43     | 107725  | 5591096   | 44922   | 2548576   |
| n20A | 20  | 5     | 4536.44 | 0.06                  | 0.05     | 2737  | 32882   | 2145  | 25037  | 3.32                                             | 3.28     | 443912  | 43121024  | 124897  | 11695197  |
| n20B | 20  | 5     | 4531.57 | 0.09                  | 0.08     | 3922  | 51239   | 2709  | 32940  | 2.64                                             | 2.58     | 307507  | 25273854  | 168025  | 13241426  |
| n20C | 20  | 5     | 5984.86 | 0.13                  | 0.12     | 3989  | 58026   | 3020  | 43086  | 4.95                                             | 4.87     | 565810  | 63771825  | 114221  | 13001572  |
| n20D | 20  | 5     | 6003.32 | 0.07                  | 0.06     | 2689  | 37956   | 2163  | 29695  | 5.92                                             | 5.84     | 578622  | 69047130  | 135188  | 14708974  |
| n20E | 20  | 5     | 5753.30 | 0.07                  | 0.06     | 2923  | 36847   | 1903  | 23505  | 5.21                                             | 5.15     | 686398  | 83361354  | 125350  | 14754613  |
| n20F | 20  | 5     | 4839.56 | 0.10                  | 0.09     | 4155  | 59390   | 3658  | 52231  | 3.81                                             | 3.76     | 443544  | 44722604  | 152581  | 14203382  |
| n20G | 20  | 5     | 4982.84 | 0.08                  | 0.07     | 4047  | 54324   | 3217  | 42035  | 4.17                                             | 4.13     | 536860  | 52707442  | 177177  | 17278303  |
| n20H | 20  | 5     | 5325.79 | 0.07                  | 0.06     | 3532  | 45894   | 2072  | 25121  | 3.24                                             | 3.19     | 374961  | 38549588  | 156528  | 14992064  |
| n20I | 20  | 5     | 4440.42 | 0.07                  | 0.07     | 3328  | 44704   | 2607  | 34185  | 5.14                                             | 5.10     | 572084  | 68727871  | 201839  | 20558300  |
| n20J | 20  | 5     | 4184.48 | 0.04                  | 0.04     | 2143  | 24359   | 1489  | 16151  | 2.07                                             | 2.04     | 361871  | 32684808  | 97298   | 7832545   |
| n30A | 30  | 5     | 6349.58 | 1.19                  | 1.13     | 46855 | 1179426 | 6052  | 132026 | 42.08                                            | 41.11    | 7518902 | 964230906 | 439074  | 62481993  |
| n30B | 30  | 5     | 6330.89 | 0.21                  | 0.18     | 7002  | 132197  | 4389  | 78259  | 8.41                                             | 8.26     | 1469045 | 182658863 | 319257  | 38852489  |
| n30C | 30  | 5     | 6286.25 | 0.32                  | 0.29     | 9675  | 212354  | 5699  | 114102 | 15.29                                            | 15.15    | 2355257 | 355641230 | 498665  | 75243238  |
| n30D | 30  | 5     | 6205.94 | 0.32                  | 0.30     | 10316 | 229184  | 5475  | 114658 | 11.86                                            | 11.74    | 1607706 | 269818564 | 515406  | 71030674  |
| n30E | 30  | 5     | 5904.85 | 0.25                  | 0.23     | 7987  | 156519  | 5355  | 97746  | 10.13                                            | 10.05    | 1596974 | 235981030 | 431013  | 57006355  |
| n30F | 30  | 5     | 5934.98 | 0.46                  | 0.43     | 13708 | 320136  | 6365  | 133788 | 11.68                                            | 11.56    | 1701316 | 258495307 | 511701  | 67573123  |
| n30G | 30  | 5     | 8583.22 | 0.29                  | 0.27     | 9517  | 202617  | 5031  | 98396  | 12.72                                            | 12.59    | 1932139 | 300326473 | 371877  | 56362814  |
| n30H | 30  | 5     | 6144.99 | 0.32                  | 0.30     | 10801 | 230428  | 5794  | 113199 | 9.71                                             | 9.62     | 1547122 | 217369106 | 459550  | 59098578  |
| n30I | 30  | 5     | 5463.43 | 0.30                  | 0.27     | 10299 | 217349  | 6051  | 113593 | 11.37                                            | 11.26    | 1685890 | 254942114 | 486980  | 71570948  |
| n30J | 30  | 5     | 6188.78 | 0.29                  | 0.27     | 9814  | 207544  | 6262  | 120676 | 8.62                                             | 8.53     | 1421050 | 188666310 | 404595  | 52421910  |
| n40A | 40  | 8     | 7461.64 | 0.73                  | 0.70     | 17656 | 533450  | 12360 | 348809 | 32.09                                            | 31.90    | 3514200 | 782776318 | 1063877 | 206802523 |
| n40B | 40  | 8     | 6776.35 | 0.73                  | 0.70     | 19495 | 563717  | 13126 | 351033 | 22.18                                            | 21.98    | 2601061 | 489332814 | 908405  | 146955703 |
| n40C | 40  | 8     | 7406.27 | 0.59                  | 0.56     | 16273 | 434869  | 11233 | 292509 | 21.63                                            | 21.43    | 2585768 | 499430889 | 597004  | 113821299 |
| n40D | 40  | 8     | 7957.55 | 0.60                  | 0.57     | 15459 | 428859  | 11699 | 316665 | 20.91                                            | 20.72    | 2387709 | 485151456 | 659014  | 117801454 |
| n40E | 40  | 8     | 6633.23 | 0.32                  | 0.30     | 9851  | 252473  | 6772  | 163729 | 17.82                                            | 17.70    | 2119375 | 413324121 | 746104  | 125654665 |
| n40F | 40  | 8     | 7375.05 | 0.68                  | 0.65     | 16628 | 482509  | 12205 | 329692 | 25.17                                            | 24.96    | 2940877 | 596251755 | 835060  | 149749272 |
| n40G | 40  | 8     | 8118.96 | 0.72                  | 0.69     | 18442 | 554633  | 13638 | 386288 | 22.20                                            | 21.99    | 2557231 | 483219065 | 691324  | 128098557 |
| n40H | 40  | 8     | 7386.82 | 0.66                  | 0.64     | 18278 | 555759  | 11512 | 324029 | 20.42                                            | 20.23    | 2255555 | 430892215 | 803073  | 141456285 |
| n40I | 40  | 8     | 7417.07 | 0.56                  | 0.53     | 13459 | 385454  | 8880  | 235315 | 23.79                                            | 23.61    | 2809435 | 568052227 | 795548  | 142507998 |
| n40J | 40  | 8     | 6842.06 | 0.54                  | 0.51     | 14167 | 397045  | 9328  | 245420 | 20.76                                            | 20.60    | 2683575 | 490000582 | 718190  | 128810720 |
